1 **Stomatal density affects rice mesophyll cell size and shape and modulates a conserved**  
2 **pattern of cells through the leaf**

3 **Sloan Jen<sup>1,\*</sup>, Im-Chai Saranrat<sup>1</sup>, Ngai Qi Yang<sup>1</sup>, Xiao Yi<sup>2</sup>, Armand Jodie<sup>1</sup>, Wilson Matthew J.<sup>1</sup>,**  
4 **Zhu Xin-Guang.<sup>3</sup>, Fleming Andrew J.<sup>1</sup>**

5 <sup>1</sup>. Plants, Photosynthesis and Soil, School of Biosciences, University of Sheffield, Sheffield, UK

6 <sup>2</sup>. Carl R. Woese Institute for Genomic Biology, University of Illinois at Urbana Champaign, Urbana,  
7 IL, USA

8 <sup>3</sup>. Institute of Plant Physiology & Ecology, Shanghai Institutes for Biological Sciences, Chinese  
9 Academy of Sciences, Shanghai, China

10 \* Corresponding author: Dr Jen Sloan [j.sloan@sheffield.ac.uk](mailto:j.sloan@sheffield.ac.uk)

11

12 Email addresses:

13 Jen Sloan: [j.sloan@sheffield.ac.uk](mailto:j.sloan@sheffield.ac.uk)

14 Saranrat Im-Chai: [sim-chai1@sheffield.ac.uk](mailto:sim-chai1@sheffield.ac.uk)

15 Qi Yang Ngai: [qyngai98@gmail.com](mailto:qyngai98@gmail.com)

16 Yi Xiao: [yixiao@illinois.edu](mailto:yixiao@illinois.edu)

17 Jodie Armand: [jarmand1@sheffield.ac.uk](mailto:jarmand1@sheffield.ac.uk)

18 Matthew J. Wilson: [matthew.j.wilson@sheffield.ac.uk](mailto:matthew.j.wilson@sheffield.ac.uk)

19 Xinguang Zhu: [zhuxg@cemps.ac.cn](mailto:zhuxg@cemps.ac.cn)

20 Andrew J. Fleming: [a.fleming@sheffield.ac.uk](mailto:a.fleming@sheffield.ac.uk)

21

22 Running Title: **Rice mesophyll cell patterning and its modulation by stomata**

23

24 Submission date: 8/11/22

25 Number of tables: 3

26 Number of Figures: 5

27 Word Count: 4569

28 Supplementary figures: 15

29 Supplementary tables: 3

30 Supplementary methods: 1

## 31 HIGHLIGHT

32 We describe a previously unreported cellular pattern in rice leaves and show that it is modulated by  
33 stomata. These results shed new light on leaf structure and function.

34

## 35 ABSTRACT

36 The structure of the mesophyll influences how light, CO<sub>2</sub> and water travels inside a leaf, affecting  
37 the rates of both photosynthesis and transpiration. Recent studies in wheat and Arabidopsis have  
38 shown that the structure of the mesophyll is influenced by the density and activity of stomata,  
39 consistent with the hypothesis that gas flow via stomata can modulate internal cell growth and  
40 separation to co-ordinate leaf structure and function. To investigate whether this also occurs in rice,  
41 a staple food crop for a large fraction of the world's population, we examined mesophyll structure in  
42 rice mutants with altered stomatal density. Our data show that stomatal function modulates  
43 mesophyll structure in rice. Variation in the degree of mesophyll lobing made a major contribution to  
44 altered mesophyll structure, suggesting that modified leaf gas flux through stomata influences an  
45 aspect of cell shape directly linked to gas exchange capacity in rice. In addition, our analysis revealed  
46 a previously unreported underlying pattern in cell size, shape and axiality across layers of the rice  
47 mesophyll, which further investigation revealed is present in a range of rice species and cultivars.  
48 The potential origin and significance of this mesophyll patterning are discussed.

49

## 50 KEYWORDS AND ABBREVIATIONS

51 Cell shape, cell size, CO<sub>2</sub>, light, mesophyll, photosynthesis, rice, stomatal density, stomatal  
52 conductance

53

54 EPF(L) - Epidermal Pattering Factor (Like)

55  $g_s$  - stomatal conductance

56  $g_{smax}$  – maximum theoretical stomatal conductance

57  $S_{mes}$  – surface area of mesophyll cell in contact with air

58

## 59 INTRODUCTION

60 Sandwiched between the upper and lower surfaces of the leaf is the mesophyll – the main site of  
61 photosynthesis. In dicotyledonous plants the mesophyll is typically separated into two layers: the  
62 adaxial tall, vertically orientated palisade cells, and the abaxial less organised, irregularly shaped  
63 'spongy' mesophyll cells (Esau, 1965; Pyke, 2012). However, in monocotyledonous plants the

64 mesophyll has traditionally been seen as more uniform (Chonan, 1978). The photosynthetic capacity  
65 of a leaf is intrinsically linked to the structure of its mesophyll. To reach a chloroplast for  
66 photosynthetic fixation, atmospheric CO<sub>2</sub> must diffuse into the leaf via the stomata, through the  
67 intercellular airspace and into the mesophyll cells across their cell walls. The area of mesophyll cell  
68 wall exposed to intercellular air space ( $S_{mes}$ ) and the relative proportions of air, cell, and cell wall  
69 within the mesophyll can determine its resistance to CO<sub>2</sub> diffusion (Evans, 2021), which limits  
70 photosynthesis (Flexas *et al.*, 2012). In a similar way, mesophyll structure influences the rate of  
71 water loss during transpiration, as CO<sub>2</sub> and water travel in opposite directions along a common  
72 pathway through the mesophyll (Wong *et al.*, 2022). Light movement through the leaf is also affected  
73 by the shape of mesophyll cells, with elongated palisade cells facilitating the penetration of light  
74 deeper into the leaf, and the more irregularly shaped spongy mesophyll cells helping to scatter light  
75 and maximise absorption (Vogelmann and Evans, 2002; Johnson *et al.*, 2005).

76

77 To maximise photosynthetic capacity the internal structure of a leaf must be coordinated with its  
78 external environment during development. Regulation of stomatal density and size in response to  
79 the environment is well understood (Casson and Gray, 2008), and structure of the mesophyll has  
80 also been shown to respond to the conditions under which the leaf develops. For instance, higher  
81 temperatures can lead to a thinner mesophyll tissue (Habermann *et al.*, 2022), and low light drives  
82 reduced cell expansion and division (with one fewer layer of cells in the palisade mesophyll), leading  
83 to a thinner mesophyll than in leaves grown under high light (Kalve *et al.*, 2014; Hoshino *et al.*, 2019).

84

85 Recent work suggests that stomatal function may influence mesophyll differentiation, with a potential  
86 link between leaf gas flux and mesophyll surface area. Dow, Berry and Bergmann (2017) showed  
87 that mesophyll cell density positively correlates with stomatal density in *Arabidopsis epf* mutants.  
88 Furthermore, Lundgren *et al.*, (2019) showed that the porosity of the palisade mesophyll is higher  
89 in transgenic *Arabidopsis* plants with increased stomatal density and correlates positively with  
90 stomatal conductance ( $g_s$ ). This phenomenon is not exclusive to eudicots, with the same study  
91 determining that the correlation between stomatal density and  $g_s$  remains across a range of wheat  
92 species.

93

94 The experiments described above linking stomatal function to mesophyll structure have been  
95 performed on both monocot grasses (wheat) and eudicot (*Arabidopsis*) suggesting it may be a  
96 conserved mechanism to coordinate leaf structure and function. However, this is yet to be reported  
97 in other important crops, such as rice. The classic histology of the rice leaf is well established, with  
98 numerous papers describing the basic cell types (for example, mesophyll, bundle sheath, epidermal,  
99 stomata, xylem, phloem) and how these cell types are arranged in space to form the tissues that

100 constitute the leaf (Esau, 1965; Chonan, 1978). Several studies have also considered how the  
101 arrangement of different cell and tissue types might contribute to overall leaf function, particularly in  
102 terms of photosynthesis; for example the efficiency of light capture, gas flux, and transport of the  
103 products of photosynthesis (Vogelmann, 1993; Parkhurst, 1994; Xiao and Zhu, 2017). The rice  
104 mesophyll is of particular interest because of the special role that mesophyll cell lobing may play in  
105 increasing the cell surface area available for photosynthetic gas exchange (Sage and Sage, 2009).

106  
107 In this paper, we report on experiments that investigate the influence of altered stomatal density on  
108 mesophyll structure in rice. Our results suggest that stomatal function modulates mesophyll structure  
109 in rice mostly via altered mesophyll cell lobing, a parameter which, via its relationship to cell surface  
110 area to volume ratio, is expected to influence leaf gas exchange capacity. Interestingly, our analysis  
111 also revealed a previously unreported pattern in cell size, shape and axiality across layers within the  
112 rice mesophyll - the potential significance of this patterning is discussed.

113

## 114 **MATERIALS AND METHODS**

### 115 **Plant material and growth conditions:**

116 OsEPF1OE-W, OsEPF1OE-S, OsEPFL9OE-2 and OsEPFL9OE-3 and their *Oryza sativa* (IR64)  
117 controls were kindly gifted to us by Professor Julie Gray. *O. sativa* (Indica) MR220, *O. sativa*  
118 (fragrant) MRQ76, and *O. sativa* (Indica) Malinja were provided by the Malaysian Agricultural  
119 Research and Development Institute. *Oryza punctata*, *Oryza meridionalis* and *Oryza latifolia* were  
120 provided by the International Rice Research institute. Rice plants were grown in a Conviron  
121 controlled environment chamber at 70% relative humidity, in a 12hr/12hr light/dark cycle at  
122 28°C/24°C with a light intensity of 750  $\mu\text{mol m}^{-2} \text{s}^{-1}$  at canopy height. Plants were germinated on  
123 filter paper with 15 ml water in petri dishes, then grown in 13D pots (0.88L) filled with 71% Kettering  
124 Loam (Boughton, UK), 23.5% Vitax John Innes No. 3 (Leicester, UK), 5% silica sand and 0.5%  
125 Osmocote Extract Standard 5–6 month slow-release fertilizer (ICL, Ipswich, UK) by volume,  
126 saturated with water for 4 to 5 weeks before gas exchange analysis was carried out and leaf samples  
127 were collected for imaging.

### 128 **Stomatal conductance:**

129 Stomatal conductance was measured using a LI-600 porometer (LI-COR, Lincoln, USA) set to a flow  
130 rate of 150  $\mu\text{mol s}^{-1}$ . Measurements were taken 2-3 hours into the light period, on the middle portion  
131 of fully expanded leaf 6, 28 days after sowing. Abaxial and adaxial conductance was measured and  
132 a mean taken of the two values.

133

134

135 **Microscopy:**

136 All samples were taken from the middle 3cm portion of the fully expanded leaf 6. OsEPF1-OE plants  
137 were harvested 21 days after sowing. All other plants were harvested 28 days after sowing. Abaxial  
138 epidermal stomatal densities and sizes were measured on nail varnish peels of dental resin  
139 impressions, with 4 fields of view per replicate. Images were taken on an Olympus BX51 microscope  
140 with an Olympus DP71 camera. Measurement of guard cell length and calculation of  $g_{smax}$  was  
141 performed as in (Caine *et al.*, 2019) on 20 stomata per plant (five per field of view) from six biological  
142 replicates.

143 Samples for Technovit® sectioning (Fig. 1 and 2) and fresh transverse hand sections (Fig. 3 and 4)  
144 were fixed in 1:4 acetic anhydride:ethanol for 48 hours, then transferred to 70% ethanol. Hand  
145 sections were cleared in chloral hydrate saturated lactic acid for 2 hours at 70°C, then stained for  
146 20-30 seconds with 0.05% Toluidine Blue O. Technovit® samples were embedded in Technovit®  
147 3040 resin and sectioned at 7µm using a Leica Microtome, then stained for 20 seconds with Toluidine  
148 Blue O. All images were observed using an Olympus BX51 light microscope, with the 40x objective,  
149 Olympus DP71 camera and Cell B imaging software. Regions of interest were between the first and  
150 second major vein out from the mid vein, between two minor veins.

151 Mesophyll cell image analysis was performed in FIJI (ImageJ 5.3g) software using an in-house  
152 macro. The mesophyll layers were identified relative to their position in the leaf (**Fig. 3A**). Layer 1  
153 was identified as directly below the upper epidermis and bulliform cells, layer 3 linking the middle of  
154 the left and right minor vein, layer 5 directly above the lower epidermis, layer 2 between layers 1 and  
155 3, and layer 4 between layers 3 and 5. Every cell within the layer was outlined by hand, and area  
156 ( $\mu\text{m}^2$ ), perimeter ( $\mu\text{m}$ ), circularity, cell length (Feret), cell width (MinFeret), convex hull perimeter  
157 ( $\mu\text{m}$ ) and cell angle (FeretAngle) measurements taken. Mesophyll cell lobing was calculated as cell  
158 perimeter divided by convex hull perimeter, FeretAngle measurements were adjusted so that 0° is  
159 in line with a line between the minor veins in the image, and 90° is perpendicular to that line (see  
160 **Supplementary Fig. S7** at *JXB* online for details). Cell projection images were created using an in-  
161 house FIJI macro – first the long axis of each cell was rotated to horizontal, then cell outlines were  
162 superimposed. For OsEPF1OE and OsEPFL9OE lines, leaf sections from eight plants were imaged.  
163 For each rice species/variety in **Fig. 3** and **4**, leaf sections from four to six different plants were  
164 imaged. From each biological repeat, four images were analysed.

165 **Computational modelling:**

166 To explore the potential impacts of larger mesophyll cells in the middle layer to leaf photosynthesis,  
167 we built four simplified models of mesophyll cell packing (**Fig. 5A-D**). Model 1 adopted a mix of two  
168 cell types with larger cells in its middle layer. Cell length and cell width was rounded based on  
169 measurements from *O. latifolia*, so that total length of three large cells in a layer equals to the total  
170 length of five small cells, and total thickness of four large cells equals to the total thickness of five  
171 small cells (**Supplementary Fig. S15**). In this way, Model 2 was generated by replacing the middle

172 layer in model 1 with small cells, and Model 3 has a same leaf thickness as Model 2. Thickness of  
173 plastid layer in both cell types were calculated by keeping the same plastid volume between a layer  
174 of larger cells and a layer of small cells. Model 4, therefore, has the same plastid volume as Model  
175 2 and Model 1. Size of vacuole in both cell types were also adjusted to result the same cytosol  
176 volume in Model 1, 2 and 4 (**Fig. 5E**).

177 With the constructed leaf geometry, light propagation inside the leaf was simulated by a Monte-Carlo  
178 ray tracing algorithm (Govaerts *et al.*, 1996; Xiao *et al.*, 2016, 2022). Due to the neglect of epidermis  
179 cells here for these simplified models, diffuse incident rays were emitted onto the upper boundary  
180 as the light source. Density of rays were tested to ensure the convergence of simulation, which is  
181 also reflected by the small error bars in the predicted light absorptance by the whole leaf (**Fig. 5F**)  
182 and each layer (**Fig. 5G**). Light absorptance of each chloroplast under blue and red light were  
183 simulated and applied to the later calculation of carboxylation rate for the process of CO<sub>2</sub> reaction  
184 and diffusion. Details of the ray tracing algorithm and a list of related parameters can be found in the  
185 Supplementary Material.

186 Process of CO<sub>2</sub> reaction and diffusion inside the leaf was simulated by a partial differential system  
187 (Tholen and Zhu, 2011; Xiao and Zhu, 2017; Xiao *et al.*, 2022). A constant CO<sub>2</sub> concentration ([CO<sub>2</sub>])  
188 was set to the upper and lower boundaries, representing [CO<sub>2</sub>] in the substomatal cavity, i.e. C<sub>i</sub>.  
189 Inside the compartments of air space, cytosol, chloroplast, mitochondria and vacuole, reaction-  
190 diffusion processes of CO<sub>2</sub> were modeled by the following equations:

$$191 \quad \begin{cases} D_c \cdot r_{f,i} \cdot \nabla^2 C = f + h - r_d - r_p \\ D_b \cdot r_{f,i} \cdot \nabla^2 B = -h \end{cases} \quad (\text{E1})$$

192 where  $C$  (mol m<sup>-3</sup>) and  $B$  (mol m<sup>-3</sup>) are the concentration of CO<sub>2</sub> and HCO<sub>3</sub><sup>-</sup> respectively.  $D_c$  (m<sup>2</sup> s<sup>-1</sup>)  
193 and  $D_b$  (m<sup>2</sup> s<sup>-1</sup>) are the liquid-phase diffusion coefficient of CO<sub>2</sub> and HCO<sub>3</sub><sup>-</sup> in water correspondingly.  
194  $r_{f,i}$  is a dimensionless factor representing the change of the diffusion coefficient relative to free

195 diffusion in water in different compartments.  $\nabla^2 C$  is the Laplace operator which equals  $\frac{\partial^2 C}{\partial x^2} + \frac{\partial^2 C}{\partial y^2}$

196 . While on the right-hand side of the equation,  $f$  is volumetric carboxylation rate (mol m<sup>-3</sup> s<sup>-1</sup>),  $h$  is  
197 hydration rate from CO<sub>2</sub> to HCO<sub>3</sub><sup>-</sup> catalyzed by CA, and  $r_d$  is volumetric respiration rate, and  $r_p$  is  
198 volumetric photo-respiration rate. In addition, these terms are distributed differently in each  
199 compartment, for example, in the cytosol  $f = r_d = r_p = 0$ , in the chloroplast  $r_d = r_p = 0$ , and in  
200 mitochondria  $f = 0$ . The volumetric carboxylation rate and photo-respiration rate were calculated  
201 based on the Farquhar-von Caemmerer-Berry model (Von Caemmerer, 2013). Details of the  
202 reaction-diffusion system and parameters used can be found in the Supplementary Material.

203

204

205



## 206 RESULTS

### 207 Changing stomatal density leads to altered mesophyll cell size and shape

208 To investigate whether a relationship exists between stomatal function and mesophyll structure in  
209 rice, we exploited the availability of published rice transgenics with altered stomatal density. In  
210 OsEPF1OE plants an epidermal patterning factor (EPF1) has been overexpressed, leading to  
211 decreased stomatal density and a concomitant decrease in stomatal conductance (Caine *et al.*,  
212 2019). Two lines were investigated, OsEPF1OE-W, which has been reported to have a weak  
213 phenotype, and OsEPF1OE-S with a strong phenotype. Both OsEPF1OE-W and OsEPF1OE-S lines  
214 have a significantly lower stomatal conductance than the comparable IR64 control plants (**Fig. 1A**,  
215 one way ANOVA,  $p = 0.0008$ , Tukey multiple comparison test,  $p < 0.05$ ,  $n = 8$ ). Stomatal density is  
216 significantly reduced in OsEPF1OE lines, while stomata size is not altered, resulting in significantly  
217 decreased theoretical maximum stomatal conductance ( $g_{smax}$ ) (**Supplementary Fig. S1A,C,E**). To  
218 investigate mesophyll structure in these lines, we first measured mesophyll cell area. As shown in  
219 **Fig. 1B**, OsEPF1OE-W and OsEPF1OE-S plants have significantly smaller mesophyll cells (**Fig.**  
220 **1B**, one way ANOVA,  $p < 0.0001$ , Tukey multiple comparison test,  $p = 0.0265$ ,  $p = 0.0007$ ,  $n = 8$ ).  
221 We used two parameters to measure cell shape: circularity - which describes the similarity of a given  
222 shape to a circle, with a higher value denoting a rounder shape, and cell lobing – calculated from  
223 the perimeter of the cell, where a greater value represents a larger deviation from the perimeter of  
224 the convex hull (**Supplementary Fig. S12 B**). Mesophyll cell shape was also altered, with decreased  
225 cell lobing (**Fig. 1C**, one way ANOVA,  $p < 0.0001$ , Tukey multiple comparison test,  $p < 0.0001$ ,  $n =$   
226  $8$ ) and increased cell circularity (**Fig. 1D**, one way ANOVA,  $p < 0.0001$ , Tukey multiple comparison  
227 test,  $p < 0.0001$ ,  $n = 8$ ) in both the OsEPF1OE-W and OsEPF1OE-S mesophyll.

228

229 To see if leaves with increased stomatal conductance also displayed a mesophyll phenotype, two  
230 transgenic rice lines overexpressing EPFL9 were used: OsEPFL9OE-2 and OsEPFL9OE-3  
231 (Bertolino *et al.*, 2022). Compared to IR64, these lines had a significantly higher stomatal  
232 conductance (**Fig. 2A**, one way ANOVA,  $p = 0.0028$ ,  $n = 8$ , Tukey multiple comparison test,  $p < 0.05$ )  
233 and stomatal density (**Fig S1B**) but a slightly smaller stomata size (**Fig S1D**), resulting in a  
234 significantly increased  $g_{smax}$  (**Fig. S1F**). Mesophyll cell area was not significantly different in the  
235 transgenic leaves from the control IR64 plants (**Fig. 2B**, one way ANOVA,  $p = 0.3389$ ,  $n = 8$ ).  
236 However, there was a change in mesophyll cell shape with OsEPFL9OE plants having significantly  
237 increased lobing (**Fig. 2C**, one way ANOVA,  $p < 0.0001$ , Tukey multiple comparison test,  $p < 0.0001$ ,  
238  $n = 8$ ) and decreased cell circularity (**Fig. 2D**, one way ANOVA,  $p < 0.0001$ , Tukey multiple  
239 comparison test,  $p < 0.0001$ ,  $n = 8$ ).

240

241

## 242 **Analysis of WT and EPF mutants reveals linkage of cell size and shape to leaf layer position**

243 During our analysis of the rice mesophyll, it became apparent that there was a non-random  
244 distribution of mesophyll cell size. In particular, it appeared that there might be a relationship between  
245 cell size and leaf layer position. To test this hypothesis, we assigned cells to tissue layers (1-5) as  
246 shown in **Fig. 3A**. To investigate this pattern, the cell size and shape data from the rice lines reported  
247 in **Fig. 1** and **Fig. 2** (IR64, OsEPF1OE, OsEPFL9OE) was split into the five tissue layers and  
248 analysed separately. For simplicity, data from the EPF1 IR64 control plants is shown in **Fig. 3** and  
249 the other five lines are shown in the supplementary material as the same pattern is seen in all six  
250 plant lines (**Supplementary Fig. S2-4**). Cell area varied significantly by layer (**Fig. 3B**,  
251 **Supplementary Fig. S2, Table 1**, one way ANOVA,  $p < 0.0001$  or  $p = 0.0001$ ,  $n = 8$ ), with the cells  
252 in the middle layer (layer 3) being significantly larger than cells in all other layers (**Table 1**, Tukey  
253 multiple comparison test,  $p < 0.05$ ,  $n = 8$ ). This pattern was present in all the lines analysed,  
254 suggesting that the changes in cell size reported in **Fig. 1** and **Fig. 2** were superimposed on an  
255 endogenous pattern, which is maintained in rice lines with altered stomatal conductance.

256 With respect to cell shape, analysis of cell lobing also identified variation between the leaf layers  
257 (**Fig. 3C, Supplementary Fig. S3, Table 2**, one way ANOVA,  $p = 0.014 - p < 0.0001$ ,  $n = 8$ ),  
258 although in this case layer 3 was not the most distinctive. Rather, cells in layer 1 (adaxial layer) of  
259 the mesophyll were generally distinguishable as having the lowest lobing value, with the lobing  
260 values in the other four layers generally being similar to each other. When mesophyll cell shape was  
261 calculated based on circularity (**Fig. 3D, Supplementary Fig. S4, Table 3**), a clear pattern emerged  
262 in which cells in the middle layer (layer 3) were significantly less circular than cells in the other layers  
263 - this was true in all six lines analysed (one way ANOVA,  $p < 0.0001$ ,  $n = 8$ , Tukey multiple  
264 comparison test,  $p < 0.05 - p < 0.0001$ ,  $n = 8$ ). General differences in mesophyll cell size and shape  
265 between layers can be seen by projecting the cell shapes within each layer on top of each other  
266 (**Fig. 3E, Supplementary Fig. S5**). Cells in layer 3 appear less circular (more ellipsoid) and larger.  
267 Layer 1 cells are circular, while layer 5 cells are smaller and squarer.

268 To find out whether stomatal density affects the size and shape of all cells throughout the mesophyll  
269 in a similar way, we compared the cells in each layer across the six lines (**Tables 1, 2 and 3**,  
270 **Supplementary Fig. S6**). OsEPF1OE cell area was significantly lower than the control in layers 1,  
271 2 and 5 (**Supplementary Fig. S6A**), while cell area in OsEPFL9OE lines was not significantly  
272 different from the control in any individual layer (**Table 1, Supplementary Fig. S6B**). Cell lobing was  
273 significantly lower in every mesophyll cell layer of OsEPF1OE lines compared to the control, while  
274 OsEPFL9OE lines have significantly higher cell lobing than the control in every mesophyll layer  
275 (**Table 2, Supplementary Fig. S6C,D**, one way ANOVA, all layers:  $p < 0.0001$ , Tukey multiple  
276 comparisons test  $p < 0.0001$ ,  $n = 8$ ). Cell circularity is also affected in the same way in every layer  
277 of the mesophyll, with OsEPF1OE mesophyll cells having higher circularity than the control, and



278 OsEPFL9OE mesophyll cells being less circular (**Table 3, Supplementary Fig. S2E,F**, one way  
279 ANOVA, all layers:  $p < 0.0001$ , Tukey multiple comparisons test  $p < 0.0001$ ,  $n = 8$ ).

280

## 281 **Patterning of mesophyll cell size and shape is observed in a range of rice cultivars and** 282 **species**

283 Having established that a pattern of cell size and shape existed in IR64 plants with varying stomatal  
284 densities, we were then interested in the universality of this mesophyll patterning in the wider rice  
285 family. We therefore studied the mesophyll in a range of rice varieties, including three *O. sativa*  
286 Indica variants (MRQ76, MR220 and Malinja), and three wild varieties (*O. latifolia*, *O. punctata* and  
287 *O. meridionalis*). These variants show a range of plant structure and size (**Supplementary Fig. S7**).

288 Again, one representative variety has been shown in the main text, *O. latifolia*, where the differences  
289 between the cell layers are particularly clear (**Fig. 4**), with the data from the remaining five varieties  
290 shown in the Supplementary Material (**Supplementary Fig. 8-11**) - the same patterns are seen in  
291 all varieties. Mesophyll cell size varied by layer in all varieties analysed (one way ANOVA  $p < 0.05$   
292 –  $p < 0.0001$ ,  $n = 4-6$ ), and cells were always largest in layer 3 and smallest in layer 4 (**Fig. 4A**,  
293 **Supplementary Fig. S8, Table S1**). The cells in layer 3 were significantly larger than those in all  
294 other layers for *O. latifolia* and *O. punctata* (**Fig. 4A, Supplementary Fig. S8D**, Tukey multiple  
295 comparison test,  $p = 0.0002$  –  $p < 0.0001$ ,  $n = 5$ ,  $n = 4$ , respectively). Mesophyll cell lobing (**Fig. 4B**,  
296 **Supplementary Fig. S9, Table S2**) was not significantly different across the adaxial/abaxial axis  
297 (one way ANOVA,  $p > 0.05$ ,  $n = 4-6$ ), although there was a tendency for lower lobing in the outer  
298 layers, particularly layer 1. In *O. latifolia*, mesophyll cell circularity varied significantly by layer (**Fig.**  
299 **4C**, one way ANOVA,  $p = 0.0105$ ,  $n = 8$ ). In all the other rice varieties, circularity was not significantly  
300 affected by layer (**Supplementary Fig. S10, Table S3**), but layer 3 did consistently have the lowest  
301 circularity. Mesophyll cell projections allow us to see differences in cell shape and size between the  
302 tissue layers in all rice varieties (**Fig. 4D, Supplementary Fig. S11**).

303

## 304 **The long axis orientation of mesophyll cells varies with leaf layer position**

305 To investigate whether a pattern in cell alignment also accompanies the layering of mesophyll cell  
306 size and shape described above, we analysed the orientation of the mesophyll cell long-axis (see  
307 **Supplementary Fig. S12**), in the OsEPF1OE and OsEPFL9OE lines and the IR64 background (**Fig.**  
308 **3F, Supplementary Fig. 13**) and the range of rice cultivars and species (**Fig. 4F, Supplementary**  
309 **Fig. S14**). An angle of  $0^\circ$  indicates that the longest axis of the cell is horizontal (along the plane of  
310 the leaf lamina), whereas cells with an angle of  $90^\circ$  are longest in the vertical plane (perpendicular  
311 to the plane of the leaf lamina). The data show that there is a pattern of cell orientation across the  
312 adaxial/abaxial axis. The long axis of mesophyll cells in the middle layers (layers 2-4) are noticeably  
313 more horizontal than the cells closest to either epidermis (layers 1 and 5). Mesophyll cells in layer 1

314 do not have a clear dominant cell angle, whereas layer 5 cells appear to have an average cell axiality  
315 of between 30 and 45°.

316

## 317 **DISCUSSION**

### 318 **Linking stomatal function and mesophyll structure in rice**

319 Recent data in *Arabidopsis* and wheat suggest that the internal structure of the mesophyll is  
320 modulated by the activity of stomata on the epidermal surfaces of leaves (Dow *et al.*, 2017; Lundgren  
321 *et al.*, 2019; Wilson *et al.*, 2021). The results presented here from rice supports this hypothesis - rice  
322 leaves manipulated to have an increased stomatal density and, hence, increased  $g_s$  and  $g_{s_{max}}$ ,  
323 displayed an increase in cell lobing, with the opposite being true for leaves with decreased  
324 stomatal density. In the leaves with reduced cell lobing (OsEPF1OE plants) there was also a  
325 decrease in cell size, whereas in the leaves displaying an increased cell lobing (OsEPFL9OE plants)  
326 there was no accompanying increase in cell size. This means that in the latter case the change in  
327 lobing must reflect a true shape change, whereas in the former case we cannot discount an indirect  
328 effect on lobing due to the change in cell size. Changes in mesophyll cell size and/or lobing will  
329 influence their surface area/volume ratio, which would likely alter the potential gas flux through the  
330 mesophyll. Thus, the increased cell lobing observed in the OsEPFL9OE leaves provides a relative  
331 increase in area for gas diffusion into and out of the cell, linking to an expected increase in gas flux  
332 due to the increased stomatal density on these leaves. Conversely, the decreased cell lobing  
333 observed in the OsEPF1OE leaves provides a relative decrease in area for gas diffusion into and  
334 out of the cell, linking to an expected decrease in gas flux due to the decreased stomatal density.

335 Mesophyll cell lobing in rice has been long associated with the potential for maximising gas flux  
336 (Sage and Sage, 2009) and our data support this proposal. However, the mechanism of mesophyll  
337 cell lobing and its regulation remains unclear (Lundgren and Fleming, 2020). There is accumulating  
338 data on how epidermal cells form intricate lobes to generate the classical jigsaw pattern of this tissue,  
339 with the link from cytoskeleton to local wall deformation being established (Sampathkumar *et al.*,  
340 2014) and with buckling of the perimeter being postulated as part of the lobe initiation process  
341 (Bidhendi and Geitmann, 2019). Presumably, similar molecular processes underpin the control of  
342 number and degree of lobing in grass mesophyll cells. Yet, how this process could be modulated by  
343 gas flux, and how the surface area/cell volume rheostat is sensed and linked to e.g. photosynthesis,  
344 remains to be elucidated.

345 It is interesting that although the data presented here for rice and previously published for wheat  
346 (Wilson *et al.*, 2021) both support a role for stomatal-derived gas exchange influencing mesophyll  
347 cell size and shape, the fine cellular details (and thus mechanism) of the response may be distinct.  
348 In wheat, mesophyll cell volume is larger (with an increase in lobe number) in genotypes with  
349 increased stomatal conductance, whereas in rice the overall cell size is little changed but there is a

350 clear change in cell lobing and circularity. Thus, It is possible that different grass leaves employ  
351 slightly different cellular approaches to maintaining surface area/volume, a trait which is presumably  
352 under evolutionary selection pressure due to its influence on leaf photosynthetic capacity and water  
353 loss.

#### 354 **Rice mesophyll displays a conserved pattern of size and shape**

355 An interesting and unexpected observation resulting from our analysis of mesophyll cell size and  
356 shape in mutants with altered stomatal density was the apparent pattern between the geometry of  
357 mesophyll cells and their location within the leaf. Quantitative comparison confirmed this was the  
358 case, with the middle cells (layer 3) always being larger than cells in adjacent and sub-adjacent  
359 layers. Cells in this layer were also characterised as having the lowest degree of circularity and an  
360 axiality, which was more parallel to the plane of the leaf surface than cells in the other layers. A  
361 distinctive pattern of cell axiality was also observed in the most adaxial mesophyll layer (layer 1)  
362 where cells displayed a much wider range than cells in the other layers, and the longest plane of  
363 cells in layer 5 was often  $\sim 45^\circ$ , reflecting their more square shape. Interestingly, these cellular  
364 patterns were generally also observed in a range of rice species and cultivars beyond the IR64 lines  
365 used for the transgenics, suggesting that the patterns reflect a widespread phenomenon. Moreover,  
366 in the transgenic IR64 lines with altered stomatal densities, although the absolute values of some  
367 parameters, for example, cell size, shifted (as described in the previous section) the underlying cell  
368 patterns remained, suggesting that the stomatal-related signal was modulating an endogenous  
369 developmental pattern that was embedded in the leaves.

370 These observations are in contrast to a text-book view that in monocots mesophyll cell size is  
371 distributed uniformly within the leaf (Esau, 1965; Chonan, 1978). There have been previous  
372 suggestions that this might be an over-simplification of the true situation. For example, in the original  
373 paper highlighting the potential importance of cell lobing (Sage and Sage, 2009), the authors showed  
374 that the cells towards the middle of the mesophyll tend to be more elongate, had a larger vacuole,  
375 and a lower proportion of chloroplast by volume than cells nearer the outside of the leaf. Our data  
376 build and extend this view to show that there is a clear and consistent pattern in a range of rice  
377 species in which cells in the middle layer are significantly larger than cells in other layers of the  
378 mesophyll, have a distinct shape (higher circularity) and display a restraint in cell axiality absent in  
379 cells in other layers of the leaf. Borsuk et al. (2022) recently used microCT technology to show that  
380 the dicotyledonous spongy mesophyll is also more organised than was previously thought,  
381 suggesting that more modern techniques and thorough analysis may be discovering patterns in leaf  
382 tissues which were previously considered disordered.

383 These observations lead to the question of how the rice mesophyll pattern arises and what, if any,  
384 advantage this arrangement of cells conveys to the leaf. With respect to development, Zeng et al.  
385 (2016) showed that the middle layer of the rice mesophyll (layer 3 in this paper) is derived from the  
386 L3 cells of the leaf primordium, whereas the cells neighbouring the epidermal cells are derived from

387 L2 cells. The layer 3 cells are thus likely to be clonally distinct, so that their size, shape and axially  
388 might, theoretically, reflect their ontogeny. A more precise analysis of cell size and shape across the  
389 emerging layers in the developing rice leaf would help test this possibility. An alternative (though not  
390 exclusive) hypothesis is that the cellular pattern across the adaxial/abaxial axis of the leaf is linked  
391 to specific function. For example, in many eudicot leaves the mesophyll cells that form the distinct  
392 palisade layer are vertically aligned and cylindrical in shape to aid light penetration to the lower  
393 spongy mesophyll (Vogelmann *et al.*, 1996). It is possible that the more vertical orientation of the  
394 cells in layer 1 and 5 of the rice mesophyll (the external layers of the mesophyll) have a similar role  
395 in directing light towards the more internal mesophyll of the leaf. Investigating light distribution in  
396 leaves with a range of layer 1 cell axially might help distinguish these possibilities. In a similar way,  
397 the horizontally elongate layer 3 cells could be specialised to, for example, transport solutes between  
398 veins.

399 Another possibility is that the variation in cell size and shape across the mesophyll reflects a trade-  
400 off between optimising surface/area to volume for gas exchange, the optimum spread of material for  
401 light absorption, and the investment costs (carbon, nitrogen, energy) in building a leaf, as has been  
402 explored by (Earles *et al.*, 2019). In order to investigate this idea we have created four simplified  
403 models of mesophyll cell packing (**Fig. 5A-D**). Two different cell types were used based on the length  
404 and width measurements from *O. latifolia* (**Supplementary Fig. S15**). Cell wall thickness and  
405 mitochondria size and distribution are the same for both cell types, but large cells have a lower  
406 proportion of plastid and higher proportion of cytosol, to reflect the findings of Sage and Sage (2009).  
407 Model 1 is most representative of mesophyll described in this study, with larger cells in the middle  
408 layer (layer 3) (**Fig. 5A**). Model 2 has five layers of small cells, making the 'leaf' slightly thinner than  
409 Model 1 (**Fig. 5B**). Model 3 has the same 'leaf' thickness as Model 2, but is made up of four layers  
410 of large cells (**Fig. 5C**). Model 4 is also made entirely of large cells, but has five layers of cells  
411 resulting in the same plastid and cytosol volume as Models 1 and 2 (**Fig. 5D**). Models 2 and 3 have  
412 the same 'leaf' thickness, while Model 4 is the thickest. One layer of three large cells has the same  
413 plastid and cytosol volume as one layer of five small cells. The amount of cell wall in contact with the  
414 air ( $S_{mes}$ ) is very similar in Models 1 and 2, lowest in Model 3 and intermediate in Model 4 (**Fig. 5E**).  
415 When the model leaves are supplied with incident light from the adaxial surface, Models 1 and 2  
416 have higher total light absorptance than Models 3 and 4 (**Fig. 5F**). However, Models 3 and 4  
417 (consisting of entirely larger cells) allow more light to travel further into the leaf, with significantly  
418 higher absorptance than Model 1 in cell layers 3 and 4 (**Fig. 5G**). This can be explained by the  
419 stronger sieve effect (as in Terashima *et al.*, 2009) in the large cells due to the chloroplast being  
420 spread more sparsely. Modelled photosynthetic performance was similar between the four cell tissue  
421 layer models, although Models 3 and 4 do perform slightly less well, particularly during the Rubisco-  
422 limited initial slope of the curve (**Fig. 5H**). Unsurprisingly, Model 3, with the lowest volume of  
423 chloroplast and smallest light absorptance has the lowest assimilation at low internal CO<sub>2</sub>. Our  
424 models suggest that, with respect to light absorption and photosynthesis there is little to distinguish

425 Model 1 and Model 2 (with the proviso, of course that these models represent major simplifications  
426 of the system). Allowing for these limitations, if light absorption and photosynthesis are not the  
427 functional drivers for the pattern of larger, more horizontally aligned cells in layer 3, what might the  
428 function be? At present we can only speculate. For example, it might reflect a mechanical role in  
429 supporting the leaf lamina. Alternatively, a by-product of the pattern is fewer cell boundaries in the  
430 lateral plane of the leaf connecting adjacent veins. If layer 3 has a role in transporting molecules to  
431 and from vascular bundles, a trait of fewer cell boundaries might be advantageous.

432 Finally, our findings have implications (both negative and positive) for related research in the broader  
433 area of rice research. Firstly, many studies taking a comparative approach to leaf structure in grasses  
434 use the middle layer of the mesophyll as an easily identifiable region to sample, thus decreasing the  
435 work-load involved in often largescale analyses (e.g. Ouk *et al.*, 2020). Our data suggest that,  
436 unfortunately, the cells in this layer are in some ways atypical of the mesophyll as a whole. On the  
437 other hand, there is significant interest in engineering rice leaves to instil a major shift in  
438 photosynthesis ( $C_4$  photosynthesis) - with decreasing the number of mesophyll cells between  
439 vascular bundles as a key aim (Ermakova *et al.*, 2020). Our data indicate that, due to their size and  
440 axiality, the middle layer of the rice mesophyll already provides the fewest cells between  
441 neighbouring veins. Driving this anisotropic growth further is an avenue to explore which might  
442 contribute to achieving this leaf engineering goal.

443

#### 444 **SUPPLEMENTARY DATA**

445 Supplementary data are available at *JXB* online.

446 Figure S1: Stomatal density and theoretical  $g_{smax}$  is altered in EPF1 and EPFL9 OE lines

447 Figure S2: Layer 3 mesophyll cells are larger than other cell layers

448 Figure S3: Layer 1 mesophyll cells have the lowest values of lobing

449 Figure S4: Layer 3 mesophyll cells have the lowest circularity

450 Figure S5: Mesophyll cell projections show the variety of cell shapes and sizes in the mesophyll  
451 cell tissue layers in EPF1OE, EPFL9OE and IR64 control lines

452 Figure S6: Mesophyll cell area, lobing, circularity by layer

453 Figure S7: Six different varieties of rice used in Figure 4 and Figures S8-11 show a range of plant  
454 structure and size

455 Figure S8: Layer 3 mesophyll cells are the largest across a range of rice varieties

456 Figure S9: Layer 1 mesophyll cells always have the lowest lobing value across a range of varieties

457 Figure S10: Layer 3 mesophyll cells have the lowest circularity across a range of rice varieties

458 Figure S11: Mesophyll cell projections show the variety of cell shapes and sizes in the mesophyll  
459 cell tissue layers in a range of rice varieties

460 Figure S12: Measurement of mesophyll cell lobing and orientation

461 Figure S13: Internal layers of mesophyll cells have a more horizontal long axis in EPF1OE,  
462 EPFL9OE and IR64 control lines

463 Figure S14: Internal layers of mesophyll cells have a more horizontal long axis in a range of six  
464 rice varieties

465 Figure S15: Measurements of large and small cells used in leaf tissue models

466 Table S1: Mesophyll cell area in a range of six rice varieties

467 Table S2: Mesophyll cell lobing in a range of six rice varieties

468 Table S3: Mesophyll circularity in a range of six rice varieties

469

#### 470 **ACKNOWLEDGEMENTS**

471 J.S. and Y.X. were supported by a Royal Society Challenge-Led grant CHL\R1\18007 “Breeding rice  
472 resilient to a high CO<sub>2</sub> future” to A.J..F and X.-G.Z.. J.A. was supported by the BBSRC White Rose  
473 DTP (BB/T007222/1). S. I.-C. was supported by a PhD studentship from the Thai government.  
474 M.J.W. was supported by a BBSRC grant Shape Shifting Stomata: The Role of Geometry in Plant  
475 Cell Function (BB/T005041) to A.F.. Thank you to Rachel Thorley for preliminary discussions on cell  
476 tissue layers.

477

#### 478 **AUTHOR CONTRIBUTIONS**

479 J.S., S.I.-C., Q.Y.N., J.A. and M.J.W. performed the experiments; Y.X. performed the computational  
480 modelling, J.S., S.I.-C., Y.Q.N., Y.X., J.A., M.J.W., X.-G.Z. and A.J.F interpreted the results and  
481 wrote the paper, with contributions from all authors. A.J.F. designed the study and led the project.

482

#### 483 **CONFLICTS OF INTEREST**

484 No conflict of interest declared

485

486

487



488 **FUNDING**

489 This work was supported by a Royal Society Challenge-Led grant [grant number CH\LR\1\18007],  
 490 the Biotechnology and Biological Sciences Research Council (BBSRC) White Rose Doctoral  
 491 Training Partnership [grant number BB/T007222/1], a BBSRC grant [grant number BB/T005041]  
 492 and a PhD studentship from the Thai government to S I-C.

493

494 **DATA AVAILABILITY**

495 The data supporting the findings of this study are available from the corresponding author, (Dr Jen  
 496 Sloan), upon request.

497

498 **TABLES**

499 **Table 1: OsEPF1OE and OsEPFL9OE mesophyll cell area varies by cell layer, with layer 3**  
 500 **consistently being the largest. The pattern of cell area for each cell layer between plant lines**  
 501 **follows the pattern shown in the total mesophyll.**

|                          | Layer 1             | Layer 2              | Layer 3              | Layer 4            | Layer 5            | ANOVA      |
|--------------------------|---------------------|----------------------|----------------------|--------------------|--------------------|------------|
| <b>IR64</b>              | 108.9(±5.4)<br>a A  | 116.5(±4.1)<br>a A   | 147.6(±4.3)<br>a,b B | 116.3(±5.1)<br>A   | 105.1(±3.3)<br>a A | p < 0.0001 |
| <b>OsEPF1OE-W</b>        | 98.2(±3.6)<br>a,b A | 96.0(±2.5)<br>b A    | 149.0(±5.8)<br>a B   | 99.8(±4.6)<br>A    | 88.24(±4.0)<br>b A | p < 0.0001 |
| <b>OsEPF1OE-S</b>        | 88.1(±3.2)<br>b A   | 93.6(±4.0)<br>b A    | 132.3(±3.6)<br>b B   | 102.6(±4.6)<br>A   | 83.34(±4.0)<br>b A | p < 0.0001 |
| <b>ANOVA (OsEPF1OE)</b>  | p = 0.0073          | p = 0.0003           | p = 0.0340           | ns                 | p = 0.0015         |            |
| <b>IR64</b>              | 101.2(±3.9)<br>A    | 102.7(±2.7)<br>a,b A | 143.7(±4.4)<br>B     | 95.05(±2.2)<br>a A | 96.5(±2.6)<br>A    | p < 0.0001 |
| <b>OsEPFL9OE-2</b>       | 96.4(±7.3)<br>A     | 95.1(±3.8)<br>a A    | 141.3(±7.6)<br>B     | 95.2(±7.5)<br>a A  | 84.8(±5.2)<br>A    | p < 0.0001 |
| <b>OsEPFL9OE-3</b>       | 100.1(±5.6)<br>A    | 113.7(±5.1)<br>b A   | 146.0(±11.6)<br>B    | 115.8(±5.4)<br>b A | 96.7(±4.4)<br>A    | p = 0.0001 |
| <b>ANOVA (OsEPFL9OE)</b> | ns                  | p = 0.0121           | ns                   | p = 0.0207         | ns                 |            |

502

503 Mesophyll cell area ( $\mu\text{m}^2$ ) separated into different cell layers (as in **Fig. 3A**) for OsEPF1OE and  
 504 OsEPFL9OE and their respective IR64 controls. Comparisons between lines, vertically, marked with  
 505 different letters (lower case) if  $p < 0.05$  (Tukey multiple comparison test,  $n = 8$ ). Comparisons  
 506 between layers, horizontally, marked with different letters (upper case) if  $p < 0.05$  (Tukey multiple  
 507 comparison test,  $n = 8$ ). One way ANOVA,  $n = 8$ ,  $p$  values as shown if  $p < 0.05$ .

508 **Table 2: *OsEPF1OE* and *OsEPFL9OE* mesophyll cell lobing varies by cell layer, with layer 1**  
 509 **consistently having the lowest lobing. Cell lobing is consistently lower in *OsEPF1OE* lines**  
 510 **than their control, and higher in *OsEPFL9OE* lines compared to their controls.**

|                              | Layer 1            | Layer 2              | Layer 3              | Layer 4                | Layer 5              | ANOVA      |
|------------------------------|--------------------|----------------------|----------------------|------------------------|----------------------|------------|
| <b>IR64</b>                  | 1.22(±0.01)<br>a A | 1.30(±0.01)<br>a B   | 1.30(±0.01)<br>a B   | 1.28(±0.01)<br>a B     | 1.25(±0.01)<br>a A,B | p < 0.0001 |
| <b>OsEPF1OE-W</b>            | 1.13(±0.01)<br>b A | 1.16(±0.01)<br>b A,B | 1.17(±0.01)<br>b B   | 1.14(±0.01)<br>b A,B   | 1.14(±0.01)<br>b A,B | p = 0.0140 |
| <b>OsEPF1OE-S</b>            | 1.14(±0.01)<br>b A | 1.19(±0.01)<br>b B   | 1.17(±0.01)<br>b A,B | 1.16(±0.01)<br>b A,B   | 1.15(±0.01)<br>b A   | p = 0.0060 |
| <b>ANOVA<br/>(OsEPF1OE)</b>  | p < 0.0001         | p < 0.0001           | p < 0.0001           | p < 0.0001             | p < 0.0001           |            |
| <b>IR64</b>                  | 1.16(±0.01)<br>a A | 1.20(±0.01)<br>a A,B | 1.22(±0.01)<br>a B   | 1.17(±0.01)<br>a A     | 1.19(±0.01)<br>a A,B | p = 0.0043 |
| <b>OsEPFL9OE-2</b>           | 1.25(±0.01)<br>b A | 1.33(±0.01)<br>b B   | 1.35(±0.02)<br>b B   | 1.27(±0.01)<br>b A     | 1.27(±0.01)<br>b A   | p < 0.0001 |
| <b>OsEPFL9OE-3</b>           | 1.25(±0.02)<br>b A | 1.34(±0.02)<br>b C   | 1.31(±0.01)<br>b B,C | 1.29(±0.01)<br>b A,B,C | 1.27(±0.01)<br>b A,B | p = 0.0006 |
| <b>ANOVA<br/>(OsEPFL9OE)</b> | p < 0.0001         | p < 0.0001           | p < 0.0001           | p < 0.0001             | p < 0.0001           |            |

511

512 Mesophyll cell lobing separated into different cell layers (as in **Fig. 3A**) for *OsEPF1OE* and  
 513 *OsEPFL9OE* and their respective IR64 controls. Comparisons between lines, vertically, marked with  
 514 different letters (lower case) if p < 0.001 (Tukey multiple comparison test, n = 8). Comparisons  
 515 between layers, horizontally, marked with different letters (upper case) if p < 0.05 (Tukey multiple  
 516 comparison test, n = 8). One way ANOVA, n = 8, p values as shown if p < 0.05.

517

518 **Table 3: OsEPF1OE and OsEPFL9OE mesophyll cell circularity varies by cell layer, with**  
 519 **layer 3 consistently being the least circular. Cell circularity is consistently higher in**  
 520 **OsEPF1OE lines than their control, and lower in OsEPFL9OE lines compared to their**  
 521 **controls.**

|                   | Layer 1            | Layer 2            | Layer 3            | Layer 4            | Layer 5            | ANOVA      |
|-------------------|--------------------|--------------------|--------------------|--------------------|--------------------|------------|
| IR64              | 0.55(±0.01)<br>a A | 0.49(±0.01)<br>a B | 0.44(±0.01)<br>a C | 0.49(±0.01)<br>a B | 0.54(±0.01)<br>a A | p < 0.0001 |
| OsEPF1OE-W        | 0.66(±0.01)<br>b A | 0.63(±0.01)<br>b A | 0.53(±0.01)<br>b B | 0.62(±0.02)<br>b A | 0.67(±0.01)<br>b A | p < 0.0001 |
| OsEPF1OE-S        | 0.64(±0.01)<br>b A | 0.60(±0.02)<br>b A | 0.53(±0.01)<br>b B | 0.58(±0.01)<br>b A | 0.65(±0.01)<br>b A | p < 0.0001 |
| ANOVA (OsEPF1OE)  | p < 0.0001         | p < 0.0001         | p < 0.0001         | p < 0.0001         | p < 0.0001         |            |
| IR64              | 0.62(±0.01)<br>a A | 0.59(±0.01)<br>a A | 0.51(±0.01)<br>a B | 0.61(±0.01)<br>a A | 0.62(±0.01)<br>a A | p < 0.0001 |
| OsEPFL9OE-2       | 0.53(±0.01)<br>b A | 0.49(±0.01)<br>b A | 0.42(±0.01)<br>b B | 0.51(±0.02)<br>b A | 0.53(±0.01)<br>b A | p < 0.0001 |
| OsEPFL9OE-3       | 0.54(±0.01)<br>b A | 0.46(±0.01)<br>b B | 0.42(±0.01)<br>b C | 0.46(±0.01)<br>b B | 0.53(±0.01)<br>b A | p < 0.0001 |
| ANOVA (OsEPFL9OE) | p < 0.0001         | p < 0.0001         | p < 0.0001         | p < 0.0001         | p < 0.0001         |            |

522

523 Mesophyll cell circularity separated into different cell layers (as in **Fig. 3A**) for OsEPF1OE and  
 524 OsEPFL9OE and their respective IR64 controls. Comparisons between lines, vertically, marked with  
 525 different letters (lower case) if p < 0.005 (Tukey multiple comparison test, n = 8). Comparisons  
 526 between layers, horizontally, marked with different letters (upper case) if p < 0.05 (Tukey multiple  
 527 comparison test, n = 8). One way ANOVA, n = 8, p values as shown if p < 0.05.

528

## 529 **FIGURE LEGENDS**

### 530 **Figure 1: Reducing stomatal conductance affects mesophyll cell size and shape**

531 Data from the middle of leaf 6 of 28 day old plants. OsEPF1OE weak (W) and strong (S) lines, and  
 532 their IR64 control. **A)** OsEPF1OE stomatal conductance is significantly lower than in the control. One  
 533 way ANOVA, p < 0.0001, n = 8.

534 **B)** Mesophyll cell area is significantly lower in OsEPF1OE lines. One way ANOVA, p < 0.0001, n =  
 535 8. **C)** Mesophyll cell lobing is significantly lower in OsEPF1OE. One way ANOVA, p < 0.0001, n = 8.

536 **D)** Mesophyll cell circularity is significantly higher in OsEPF1OE lines. One way ANOVA, p < 0.0001,  
 537 n = 8.

538 All multiple pairwise comparisons, Tukey, p values as shown, n = 8.

539

540 **Figure 2: Mesophyll cell shape is affected by increased stomatal conductance**

541 Data from the middle of leaf 6 of 21 day old plants. Two individual EPFL9OE lines (2 and 3) and their  
542 IR64 control.

543 **A)** OsEPFL9OE stomatal conductance is significantly higher than the control line. one way ANOVA,  
544  $p = 0.0028$ ,  $n = 8$ . **B)** Mesophyll cell area is not affected by the change in stomatal conductance.  
545 One way ANOVA,  $p = 0.3389$ ,  $n = 8$ . **C)** Mesophyll cell lobiness is significantly higher in both  
546 OsEPFL9OE lines. One way ANOVA,  $p < 0.0001$ ,  $n = 8$ . **D)** Mesophyll cell circularity is significantly  
547 lower in OsEPFL9OE plants. One way ANOVA,  $p < 0.0001$ ,  $n = 8$ .

548 All multiple pairwise comparisons, Tukey,  $p$  values as shown,  $n = 8$ .

549 **Figure 3: The rice mesophyll can be divided into 5 cell tissue layers**

550 **A)** Representation of rice mesophyll with different cell layers highlighted from layer 1 (touching the  
551 adaxial epidermis) to layer 5 (touching the abaxial epidermis). Layer 3 is a continuous row of cells  
552 between the two minor veins. **B-F)** Representative data from middle of leaf 6 of 28 day old IR64  
553 control (from EPF1OE experiment). **B)** Mesophyll cell area is largest in layer 3 **C)** Mesophyll cell  
554 lobing is lowest in layer 1. **D)** Mesophyll cell circularity is lowest in layer 3. **B-D)** One way ANOVA  $p$   
555  $< 0.0001$ , Tukey's multiple comparison test,  $p$  values as shown,  $n = 8$ . **E)** Mesophyll cell projections  
556 of all cells in each layer from one representative individual. **F)** Mesophyll cell angle – the angle of  
557 the longest axis of each cell differs by cell layer. Scale bar = 20  $\mu\text{m}$

558

559 **Figure 4: The tissue layer patterning seen in IR64 is present in a range of rice varieties –**  
560 **demonstrated by *O. latifolia***

561 Representative data from middle of leaf 6 of 28 day old *O. latifolia*. **A)** Mesophyll cell area is largest  
562 in layer 3, One way ANOVA,  $p < 0.0001$ , Tukey pairwise multiple comparisons,  $p$  values as shown,  
563  $n = 6$  **B)** Mesophyll cell lobing is lowest in layer 1. **C)** Mesophyll cell circularity is lowest in layer 3.  
564 One way ANOVA,  $p = 0.0105$ , Tukey pairwise multiple comparisons,  $p$  values as shown,  $n = 6$ . **D)**  
565 Mesophyll cell projections of all cells in each layer from one representative individual. **E)** Mesophyll  
566 cell angle – the angle of the longest axis of each cell differs by cell layer. Scale bar = 20  $\mu\text{m}$

567

568 **Figure 5: CO<sub>2</sub> and light move differently through four simplified mesophyll tissue models**

569 Four cell tissue layer models were designed, green represents plastid, white centres represent  
570 cytosol: **A)** Model 1 has larger cells in the middle layer (layer 3), **B)** Model 2 has five layers of small  
571 cells, **C)** Model 3 has four layers of large cells, **D)** Model 5 has five layers of large cells. Models 1, 2  
572 and 4 have the same plastid and cytosol volume. Models 2 and 3 are the same leaf thickness. **E)**

573  $S_{mes}$  and the proportions of different cell elements in the 4 models. **F)** Total red and blue light  
574 absorptance is higher in Models 1 and 2 than Models 3 and 4 – mean with SEM. Two way ANOVA,  
575  $p < 0.0001$ , Tukey multiple comparison - different letters represent significantly different values,  $p <$   
576  $0.0001$ ,  $n = 3$  **G)** Blue light absorptance in each cell layer of the 4 models – mean values with SEM.  
577 Individual one way ANOVA performed for each cell layer - Layers 1-4  $p < 0.001$ , Layer 5 ns, Tukey  
578 multiple comparison - different letters represent significantly different values,  $p < 0.05$ ,  $n = 3$  **H)**  
579 Assimilation/Internal  $CO_2$  ( $C_i$ ) curves are very similar for the four models. Mean values,  $n = 3$ , SEM  
580 is too small for error bars to show.

581

### 582 **Figure S1: stomatal density and theoretical $g_{smax}$ is altered in EPF1 and EPFL9 OE lines**

583 Data from the middle of leaf 6. **A,C,E)** 28 day old OsEPF1OE weak (W) and strong (S) lines, and  
584 their IR64 control. **B,D,F)** 21 day old OsEPFL9OE line 2 and 3 and their IR64 control. **A)** OsEPF1OE  
585 abaxial stomatal density is significantly lower than in the control. One way ANOVA,  $p < 0.0001$ ,  $n =$   
586  $8$ . **B)** OsEPFL9OE abaxial stomatal density is significantly higher than in the control. One way  
587 ANOVA,  $p = 0.0002$ ,  $n = 8$ . **C)** OsEPF1OE guard cell length is not different from the control. One  
588 way ANOVA,  $p > 0.05$ ,  $n = 8$ . **D)** OsEPFL9OE-3 has significantly smaller guard cells than the control.  
589 One way ANOVA,  $p = 0.0051$ ,  $n = 8$ . **E)** OsEPF1OE lines have significantly lower theoretical  $g_{smax}$   
590 than the control. One way ANOVA,  $p < 0.0001$ ,  $n = 8$ . **F)** OsEPFL9 lines have significantly higher  
591 theoretical  $g_{smax}$  than the control. One way ANOVA,  $p = 0.0028$ .

592 All multiple pairwise comparisons, Tukey,  $p$  values as shown,  $n = 8$ .

593

### 594 **Figure S2: Layer 3 mesophyll cells are larger than other cell layers**

595 Mesophyll cell area from the middle of leaf 6. **A)** 28 day old EPF1 IR64 control, **C)** OsEPF1OE-W  
596 and **E)** OsEPF1OE-S, **B)** 21 day old EPFL9 IR64 control, **D)** OsEPFL9OE-2 and **F)** OsEPFL9OE-3.  
597 Cell area varies in the adaxial/abaxial plane, one way ANOVA,  $p < 0.0001$  or  $p = 0.0001$  (see Table  
598 1),  $n = 8$ . Layer 3 cells are significantly larger than cells in the other layers in all lines, multiple  
599 pairwise comparisons, Tukey,  $p$  values as shown,  $n = 8$ .

600

### 601 **Figure S3: Layer 1 mesophyll cells have the lowest values of lobing**

602 Mesophyll cell lobing from the middle of leaf 6. **A)** 28 day old EPF1 IR64 control, **C)** OsEPF1OE-W  
603 and **E)** OsEPF1OE-S, **B)** 21 day old EPFL9 IR64 control, **D)** OsEPFL9OE-2 and **F)** OsEPFL9OE-3.  
604 Cell lobing varies in the adaxial/abaxial plane, one way ANOVA,  $p < 0.0001$ - $p = 0.014$  (see Table  
605 2),  $n = 8$ . Layer 1 cells always have the lowest lobing level, multiple pairwise comparisons, Tukey,  $p$   
606 values as shown,  $n = 8$ .

607

608 **Figure S4: Layer 3 mesophyll cells have the lowest circularity**

609 Mesophyll cell circularity from the middle of leaf 6. **A)** 28 day old EPF1 IR64 control, **C)** OsEPF1OE-  
610 W and **E)** OsEPF1OE-S, **B)** 21 day old EPFL9 IR64 control, **D)** OsEPFL9OE-2 and **F)** OsEPFL9OE-  
611 3. Cell circularity varies in the adaxial/abaxial plane, one way ANOVA,  $p < 0.0001$ ,  $n = 8$ . Layer 3  
612 cells have significantly lower circularity than cells in the other layers in all lines, multiple pairwise  
613 comparisons, Tukey,  $p$  values as shown,  $n = 8$ .

614

615 **Figure S5: Mesophyll cell projections show the variety of cell shapes and sizes in the**  
616 **mesophyll cell tissue layers in EPF1OE, EPFL9OE and IR64 control lines**

617 Mesophyll cell projections of all cells in each layer from one representative individual per genotype.

618 Scale bar = 20  $\mu\text{m}$

619

620 **Figure S6: Mesophyll cell area, lobing, circularity by layer**

621 **A,C,E)** 28 day old leaf 6 from OsEPF1OE lines and their control. **B,D,F)** 21 day old leaf 6 from  
622 OsEPFL9OE lines and their control. **A,B)** Mesophyll cell area by layer. **C,D)** Mesophyll cell lobing by  
623 layer, **E,F)** Mesophyll cell circularity by layer.

624 **A)** One way ANOVA, layer 1:  $p = 0.0073$ , layer 2:  $p = 0.0003$ , layer 3:  $p = 0.0340$ , layer 4: ns, layer  
625 5:  $p = 0.0015$ ,  $n = 8$ . **B)** One way ANOVA, layer 1: ns, layer 2:  $p = 0.0012$ , layer 3: ns, layer 4:  $p =$   
626  $0.0207$ , layer 5: ns,  $n = 8$ . **C)** One way ANOVA, all layers:  $p < 0.0001$ ,  $n = 8$ . **D)** One way ANOVA,  
627 all layers:  $p < 0.0001$ ,  $n = 8$ . **E)** One way ANOVA, all layers:  $p < 0.0001$ ,  $n = 8$ . **F)** One way ANOVA,  
628 all layers:  $p < 0.0001$ ,  $n = 8$ .

629

630 **Figure S7: Six different varieties of rice used in Figure 4 and Supplementary Figures 8-11**  
631 **show a range of plant structure and size**

632 Plants pictured at 35 days old. **A)** *O. sativa* (MR220), **B)** *O. latifolia* **C)** *O. sativa* (MRQ76), **D)** *O.*  
633 *punctata*, **E)** *O. sativa* (Malinja) **F)** *O. meridionalis*

634

635 **Figure S8: Layer 3 mesophyll cells are the largest across a range of rice varieties**

636 Mesophyll cell area from the middle of leaf 6 of six rice varieties. Cell size varies across the  
637 adaxial/abaxial axis in all varieties. One way ANOVA: **A)** *O. sativa* (MR220),  $p = 0.0081$   $n = 6$ , **B)**  
638 *O. latifolia*,  $p < 0.0001$ ,  $n = 6$ , **C)** *O. sativa* (MRQ76),  $p = 0.0368$ ,  $n = 5$ , **D)** *O. punctata*,  $p < 0.0001$ ,  
639  $n = 4$ , **E)** *O. sativa* (Malinja),  $p = 0.0009$ ,  $n = 6$ , **F)** *O. meridionalis*,  $p = 0.0467$ ,  $n = 6$ . Cells in layer



640 3 are largest and layer 4 cells are smallest in every variety. In *O. latifolia* (B) and *O. punctata* (D),  
641 layer 3 cells are significantly larger than cells in any other layer.

642 All multiple pairwise comparisons, Tukey, p values as shown, n = 4-6.

643

644 **Figure S9: Layer 1 mesophyll cells always have the lowest lobing value across a range of**  
645 **varieties**

646 Mesophyll cell lobing from the middle of leaf 6 of six rice varieties – A) *O. sativa* (MR220), B) *O.*  
647 *latifolia* C) *O. sativa* (MRQ76), D) *O. punctata*, E) *O. sativa* (Malinja) F) *O. meridionalis*

648 Cell lobing does not significantly vary across the abaxial/adaxial gradient. One way ANOVA, p >  
649 0.05, n = 4-6. Cells in layer 1 always show the lowest level of lobing.

650

651 **Figure S10: Layer 3 mesophyll cells have the lowest circularity across a range of rice varieties**

652 Mesophyll cell area from the middle of leaf 6 of six rice varieties – A) *O. sativa* (MR220), B) *O.*  
653 *latifolia*, One way ANOVA, p = 0.0105, Tukey multiple pairwise comparisons, p values as shown, n  
654 = 6, C) *O. sativa* (MRQ76), D) *O. punctata*, E) *O. sativa* (Malinja) F) *O. meridionalis*. A,C,D,E,F)  
655 One way ANOVA, p > 0.05, n = 4-6

656

657 **Figure S11: Mesophyll cell projections show the variety of cell shapes and sizes in the**  
658 **mesophyll cell tissue layers in a range of rice varieties**

659 Mesophyll cell projections of all cells in each layer of one representative individual for 5 rice varieties

660 Scale bar = 20µm

661

662 **Figure S12: Measurement of mesophyll cell lobiness and orientation**

663 A) a line was drawn between the two minor veins in each image. The angle of this line was measured  
664 and considered horizontal.

665 B) Cell perimeter and convex hull perimeter were measured in ImageJ. Lobiness is calculated as  
666 cell perimeter/convex hull perimeter.

667 The FeretAngle measurement (0-180 degrees) is the angle between the Feret's diameter and a line  
668 parallel to the x-axis of the image. The horizontal angle was subtracted from this angle so that a cell  
669 angle of 0° is parallel to the line between the minor veins. If the FeretAngle is >180°, the angle was  
670 adjusted (180-FeretAngle) so that all angles were between 0 and 90° for ease of comparison. A cell  
671 with an angle of 90° is aligned with its longest axis vertical (or perpendicular to the line between the  
672 minor veins).

673 **Figure S13: Internal layers of mesophyll cells have a more horizontal long axis**

674 Mesophyll cell angle in cells from different cell layers from the middle of leaf 6. 28 day old EPF1 IR64  
675 control, OsEPF1OE-W and OsEPF1OE-S, 21 day old EPFL9 IR64 control, OsEPFL9OE-2 and  
676 OsEPFL9OE-3. The longest axis of cells in the internal mesophyll layers (2-4) is more horizontal  
677 than the layers adjacent to the epidermes. Cells in layer 1 (adaxial) have a fairly random distribution  
678 of cell angle, layer 5 cells (abaxial) are most commonly at an angle of 30-40°.

679

680 **Figure S14: Internal layers of mesophyll cells have a more horizontal long axis in a range of**  
681 **six rice varieties**

682 The longest axis of cells in the internal mesophyll layers (2-4) is more horizontal than the layers  
683 adjacent to the epidermes. Cells in layer 1 (adaxial) have a fairly random distribution of cell angle,  
684 layer 5 cells (abaxial) are most commonly at an angle of 30-40°.

685

686 **Figure S15: Measurements of large and small cells used in leaf tissue models**

687 **A)** Detailed representation of each cell in the leaf tissue model. **B)** Different parameter  
688 measurements used for small and large cells in leaf tissue models

689

690 **Table S1: Mesophyll cell area in a range of six rice varieties**

691 Mesophyll cell area separated into different cell layers (as in **Fig. 3A**) for six *Oryza* varieties.  
692 Comparisons between lines, vertically are not significant (one way ANOVA,  $p > 0.05$ ,  $n = 4-6$ ).  
693 Comparisons between layers, horizontally, marked with different letters (upper case) if  $p < 0.05$   
694 (Tukey multiple comparison test,  $n = 4-6$ ). One way ANOVA,  $n = 4-6$ ,  $p$  values as shown.

695

696 **Table S2: Mesophyll cell lobiness in a range of six rice varieties**

697 Mesophyll cell lobiness separated into different cell layers (as in **Fig. 3A**) for six *ORYZA* varieties.  
698 Comparisons between lines (vertically), and between layers (horizontally) were not significant (One  
699 way ANOVA,  $p > 0.05$ ,  $n = 4-6$ ).

700

701 **Table S3: Mesophyll circularity in a range of six rice varieties**

702 Mesophyll cell circularity separated into different cell layers (as in **Fig. 3A**) for six *ORYZA* varieties.  
703 Comparisons between lines (vertically), and between layers (horizontally) were not significant (One  
704 way ANOVA,  $p > 0.05$ ,  $n = 4-6$ ).

705

## REFERENCES

- Bertolino LT, Caine RS, Zoulias N, Yin X, Chater CCC, Biswal A, Quick WP, Gray JE.** 2022. Stomatal Development and Gene Expression in Rice Florets. *Plant and Cell Physiology*, pcac120. doi: 10.1093/pcp/pcac120
- Bidhendi AJ, Geitmann A.** 2019. Geometrical Details Matter for Mechanical Modeling of Cell Morphogenesis. *Developmental Cell* **50(1)**, 117-125.e2.
- Borsuk AM, Roddy AB, Th eroux-Rancourt G, Brodersen CR.** 2022. Structural organization of the spongy mesophyll. *New Phytologist* **234(3)**, 946–960.
- Von Caemmerer S.** 2013. Steady-state models of photosynthesis. *Plant, Cell and Environment* **36(9)**, 1617–1630.
- Caine RS, Yin X, Sloan J, et al.** 2019. Rice with reduced stomatal density conserves water and has improved drought tolerance under future climate conditions. *New Phytologist* **221(1)**, 371-384.
- Casson S, Gray JE.** 2008. Influence of environmental factors on stomatal development. *New Phytologist* **178(1)**, 9–23.
- Chonan N.** 1978. A Comparative Anatomy of Mesophyll Among the Leaves of Gramineous Crops. *Japan Agricultural Research Quarterly*, **12**, 128–131.
- Dow GJ, Berry JA, Bergmann DC.** 2017. Disruption of stomatal lineage signaling or transcriptional regulators has differential effects on mesophyll development, but maintains coordination of gas exchange. *The New Phytologist* **216(1)**, 69–75.
- Earles JM, Buckley TN, Brodersen CR, et al.** 2019. Embracing 3D Complexity in Leaf Carbon–Water Exchange. *Trends in Plant Science* **24(1)**, 15-24.
- Esau K.** 1965. *Plant Anatomy* 2<sup>nd</sup> edn (John Wiley, Ed.). New York.
- Evans JR.** 2021. Mesophyll conductance: walls, membranes and spatial complexity. *New Phytologist* **229**, 1864–1876.
- Flexas J, Barbour MM, Brendel O, et al.** 2012. Mesophyll diffusion conductance to CO<sub>2</sub>: An unappreciated central player in photosynthesis. *Plant Science* **193–194**, 70–84.

- Govaerts YM, Jacquemoud S, Verstraete MM, Ustin SL.** 1996. Three-dimensional radiation transfer modeling in a dicotyledon leaf. *Applied Optics* **35(33)**, 6585.
- Habermann E, Contin DR, Afonso LF, Barosela JR, de Pinho Costa KA, Viciado DO, Groppo M, Martinez CA.** 2022. Future warming will change the chemical composition and leaf blade structure of tropical C3 and C4 forage species depending on soil moisture levels. *Science of the Total Environment* **821**. 153342.
- Hoshino R, Yoshida Y, Tsukaya H.** 2019. Multiple steps of leaf thickening during sun-leaf formation in *Arabidopsis*. *Plant Journal* **100(4)**, 738–753.
- Johnson DM, Smith WK, Vogelmann TC, Brodersen CR.** 2005. Leaf architecture and direction of incident light influence mesophyll fluorescence profiles 1. *American Journal of Botany* **92(9)**, 1425-31.
- Kalve S, Fotschki J, Beeckman T, Vissenberg K, Beemster GTS.** 2014. Three-dimensional patterns of cell division and expansion throughout the development of *Arabidopsis thaliana* leaves. *Journal of Experimental Botany* **65(22)**, 6385–6397.
- Lundgren MR, Fleming AJ.** 2020. Cellular perspectives for improving mesophyll conductance. *Plant Journal* **10**, 845–857.
- Lundgren MR, Mathers A, Baillie AL, et al.** 2019. Mesophyll porosity is modulated by the presence of functional stomata. *Nature Communications* **10**, 2825.
- Parkhurst DF.** 1994. Diffusion of CO<sub>2</sub> and other gases inside leaves. *New Phytologist* **126(3)** 449-479.
- Pyke K.** 2012. Mesophyll. eLS. doi:10.1002/9780470015902.a0002081.pub2
- Sage TL, Sage RF.** 2009. The functional anatomy of rice leaves: Implications for refixation of photorespiratory CO<sub>2</sub> and efforts to engineer C<sub>4</sub> photosynthesis into rice. *Plant and Cell Physiology* **50(4)**, 756–772.
- Sampathkumar A, Krupinski P, Wightman R, Milani P, Berquand A, Boudaoud A, Hamant O, Jönsson H, Meyerowitz EM.** 2014. Subcellular and supracellular mechanical stress prescribes cytoskeleton behavior in *Arabidopsis* cotyledon pavement cells. *eLife*, eLife Sciences Publications, Ltd **3**. <https://doi.org/10.7554/eLife.01967>

- Terashima I, Fujita T, Inoue T, Chow WS, Oguchi R.** 2009. Green light drives leaf photosynthesis more efficiently than red light in strong white light: Revisiting the enigmatic question of why leaves are green. *Plant and Cell Physiology* **50(4)**, 684–697.
- Tholen D, Zhu XG.** 2011. The mechanistic basis of internal conductance: A theoretical analysis of mesophyll cell photosynthesis and CO<sub>2</sub> diffusion. *Plant Physiology* **156(1)**, 90–105.
- Vogelmann TC.** 1993. PLANT TISSUE OPTICS. *Annu. Rev. Plant Physiol. Plant Mol. Biol.*, **44**, 231-251.
- Vogelmann TC, Bornman JF, Yates Vogelmann DJ, Yates JF.** 1996. Focusing of light by leaf epidermal cells. *PHYSIOLOGIA PLANTARUM* **98**, 43–56.
- Vogelmann TC, Evans JR.** 2002. Profiles of light absorption and chlorophyll within spinach leaves from chlorophyll fluorescence. *Plant, Cell and Environment*, **25(10)**, 1313-1323.
- Wilson MJ, Fradera-Soler M, Summers R, Sturrock CJ, Fleming AJ.** 2021. Ploidy influences wheat mesophyll cell geometry, packing and leaf function. *Plant Direct* **5(4)**, e00314, [doi.org/10.1002/pld3.314](https://doi.org/10.1002/pld3.314).
- Wong SC, Canny MJ, Holloway-Phillips M, Stuart-Williams H, Cernusak LA, Márquez DA, Farquhar GD.** 2022. Humidity gradients in the air spaces of leaves. *Nature Plants* **8**, 971–978.
- Xiao Y, Sloan J, Hepworth C et al.** 2022. Defining the scope for altering rice leaf anatomy to improve photosynthesis : A modelling approach. *New Phytologist*, doi: 10.1111/nph.18564
- Xiao Y, Tholen D, Zhu XG.** 2016. The influence of leaf anatomy on the internal light environment and photosynthetic electron transport rate: Exploration with a new leaf ray tracing model. *Journal of Experimental Botany* **67**, 6021–6035.
- Xiao Y, Zhu XG.** 2017. Components of mesophyll resistance and their environmental responses: A theoretical modelling analysis. *Plant Cell and Environment* **40**, 2729–2742.
- Zeng M, Hu B, Li J, Zhang G, Ruan Y, Huang H, Wang H, Xu L.** 2016. Stem cell lineage in body layer specialization and vascular patterning of rice root and leaf. *Science Bulletin* **61**, 847–858.

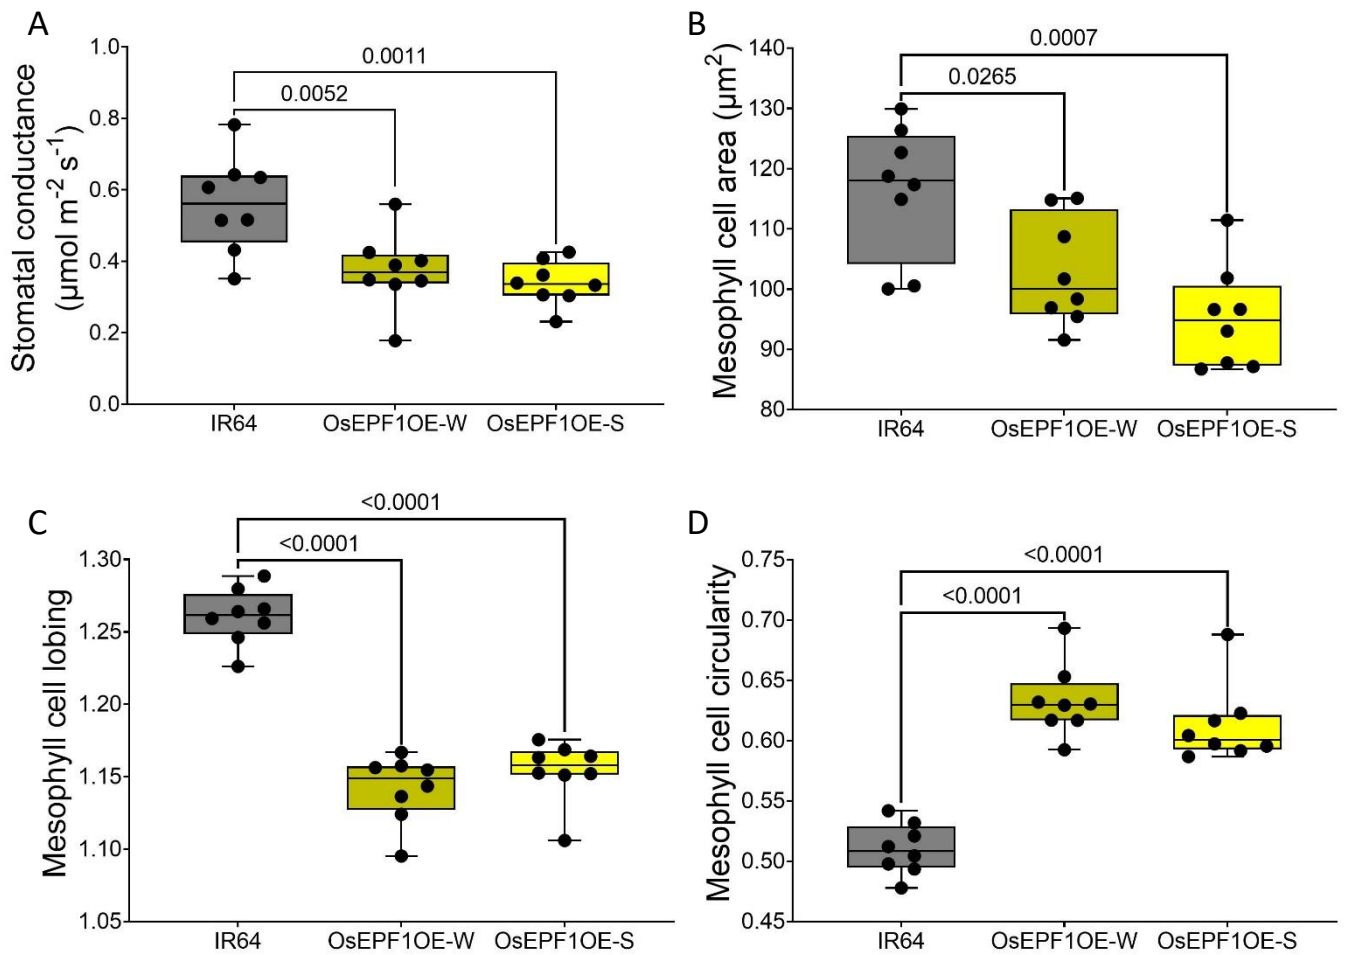

**Figure 1: Reducing stomatal conductance affects mesophyll cell size and shape**

Data from the middle of leaf 6 of 28 day old plants. OsEPF1OE weak (W) and strong (S) lines, and their IR64 control. **A)** OsEPF1OE stomatal conductance is significantly lower than in the control. One way ANOVA,  $p < 0.0001$ ,  $n = 8$ .

**B)** Mesophyll cell area is significantly lower in OsEPF1OE lines. One way ANOVA,  $p < 0.0001$ ,  $n = 8$ . **C)** Mesophyll cell lobing is significantly lower in OsEPF1OE. One way ANOVA,  $p < 0.0001$ ,  $n = 8$ . **D)** Mesophyll cell circularity is significantly higher in OsEPF1OE lines. One way ANOVA,  $p < 0.0001$ ,  $n = 8$ .

All multiple pairwise comparisons, Tukey,  $p$  values as shown,  $n = 8$ .



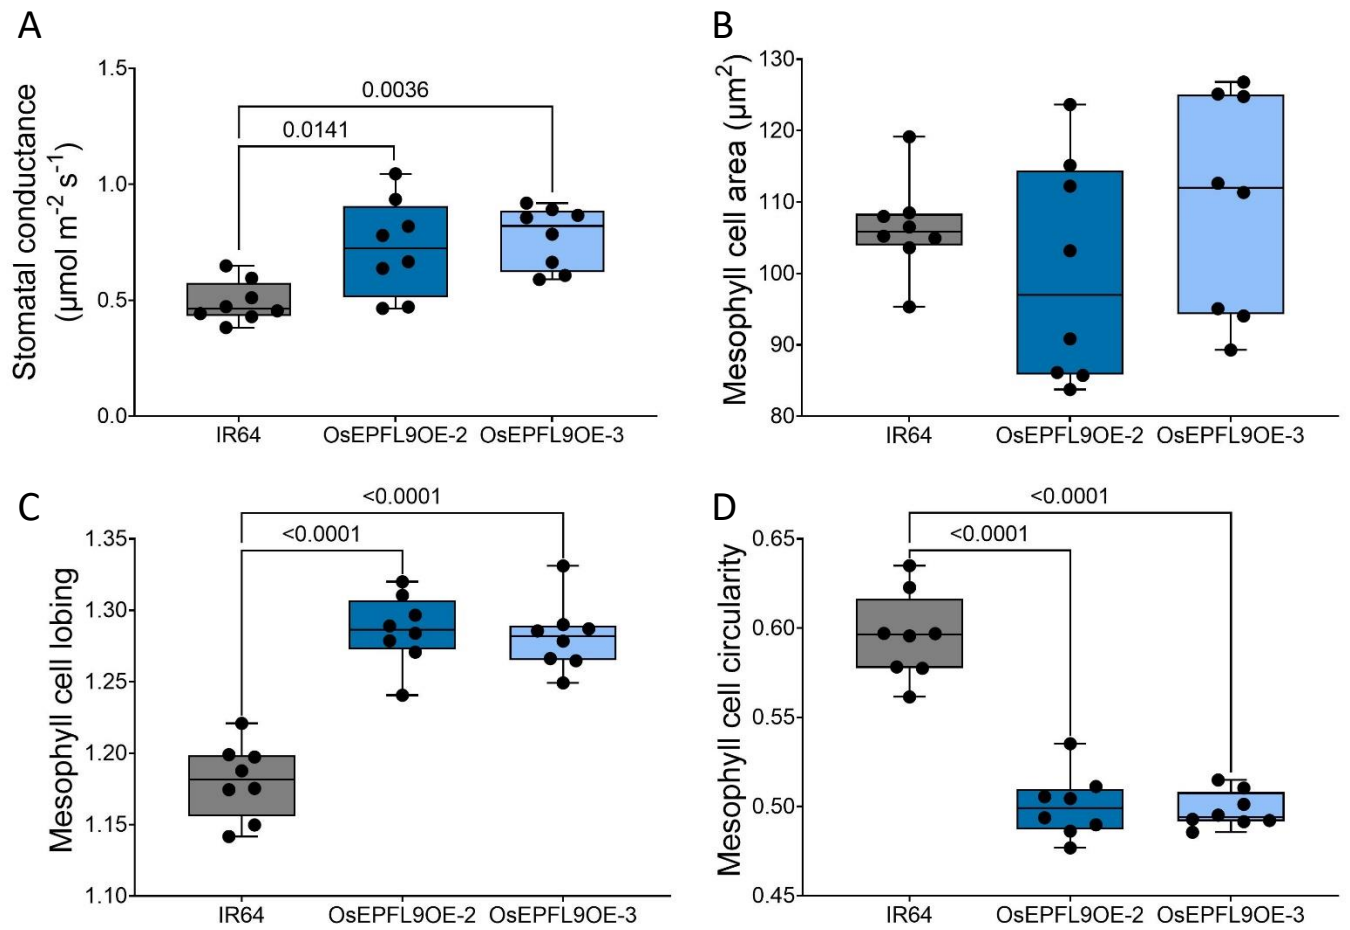

## Figure 2: Mesophyll cell shape is affected by increased stomatal conductance

Data from the middle of leaf 6 of 21 day old plants. Two individual EPFL9OE lines (2 and 3) and their IR64 control.

**A)** OsEPFL9OE stomatal conductance is significantly higher than the control line. one way ANOVA,  $p = 0.0028$ ,  $n = 8$ . **B)** Mesophyll cell area is not affected by the change in stomatal conductance. One way ANOVA,  $p = 0.3389$ ,  $n = 8$ . **C)** Mesophyll cell lobiness is significantly higher in both OsEPFL9OE lines. One way ANOVA,  $p < 0.0001$ ,  $n = 8$ . **D)** Mesophyll cell circularity is significantly lower in OsEPFL9OE plants. One way ANOVA,  $p < 0.0001$ ,  $n = 8$ .

All multiple pairwise comparisons, Tukey,  $p$  values as shown,  $n = 8$ .

A

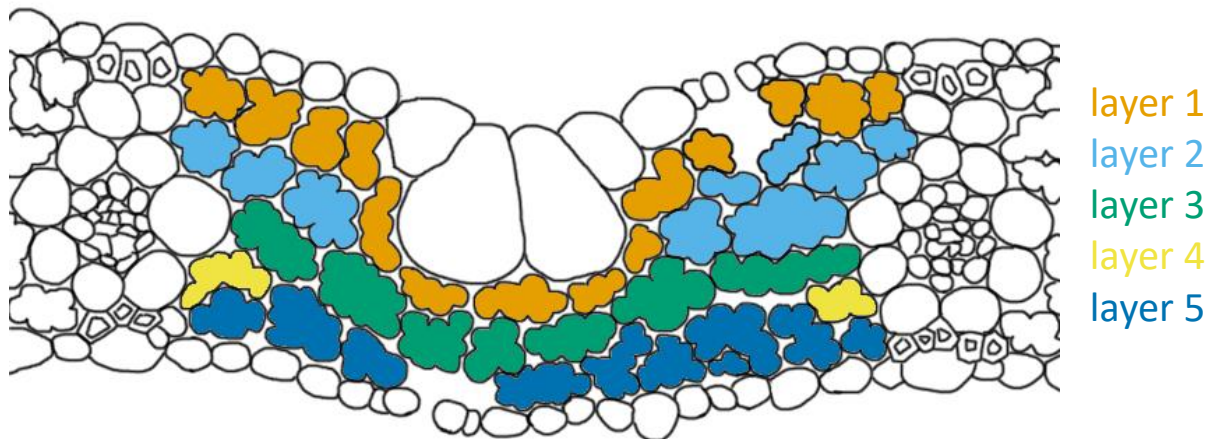

B

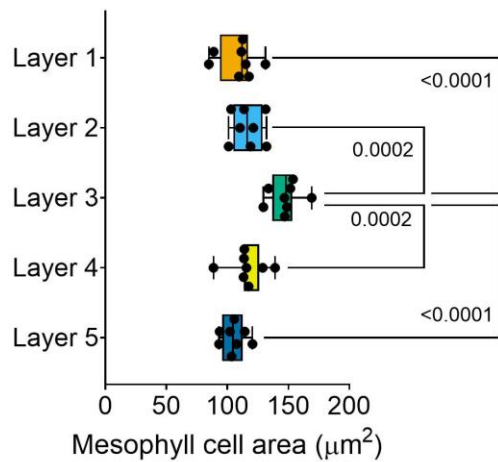

C

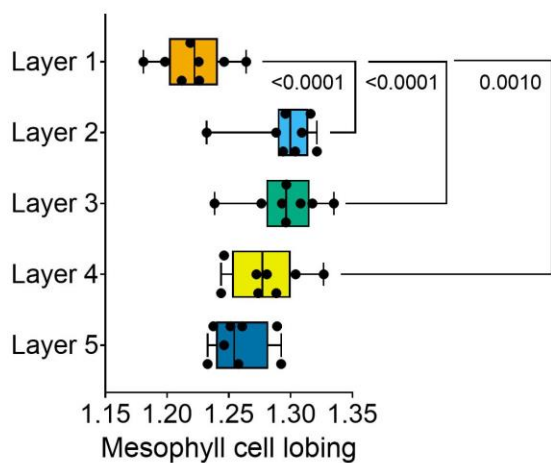

D

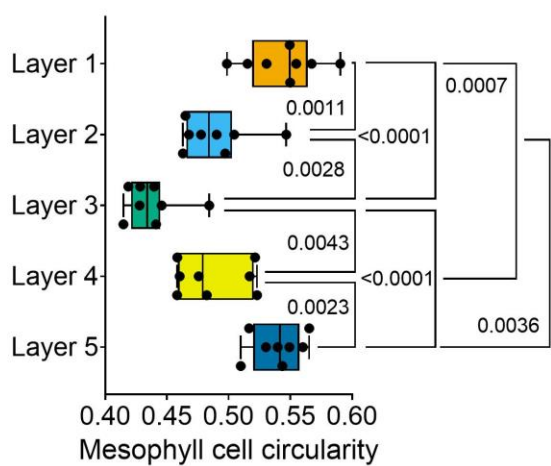

E

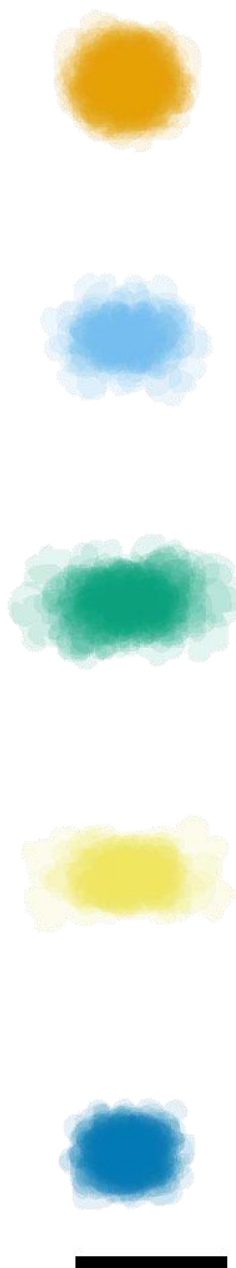

F

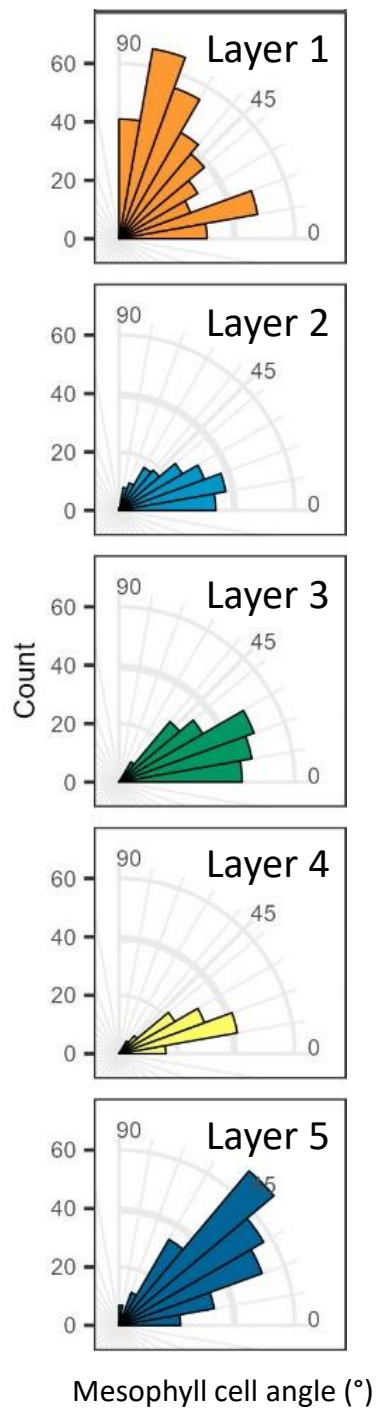

**Figure 3: The rice mesophyll can be divided into 5 cell tissue layers**

**A)** Representation of rice mesophyll with different cell layers highlighted from layer 1 (touching the adaxial epidermis) to layer 5 (touching the abaxial epidermis). Layer 3 is a continuous row of cells between the two minor veins. **B-F)** Representative data from middle of leaf 6 of 28 day old IR64 control (from EPF1OE experiment). **B)** Mesophyll cell area is largest in layer 3 **C)** Mesophyll cell lobing is lowest in layer 1. **D)** Mesophyll cell circularity is lowest in layer 3. **B-D)** One way ANOVA  $p < 0.0001$ , Tukey's multiple comparison test, p values as shown,  $n = 8$ . **E)** Mesophyll cell projections of all cells in each layer from one representative individual. **F)** Mesophyll cell angle – the angle of the longest axis of each cell differs by cell layer. Scale bar = 20  $\mu\text{m}$

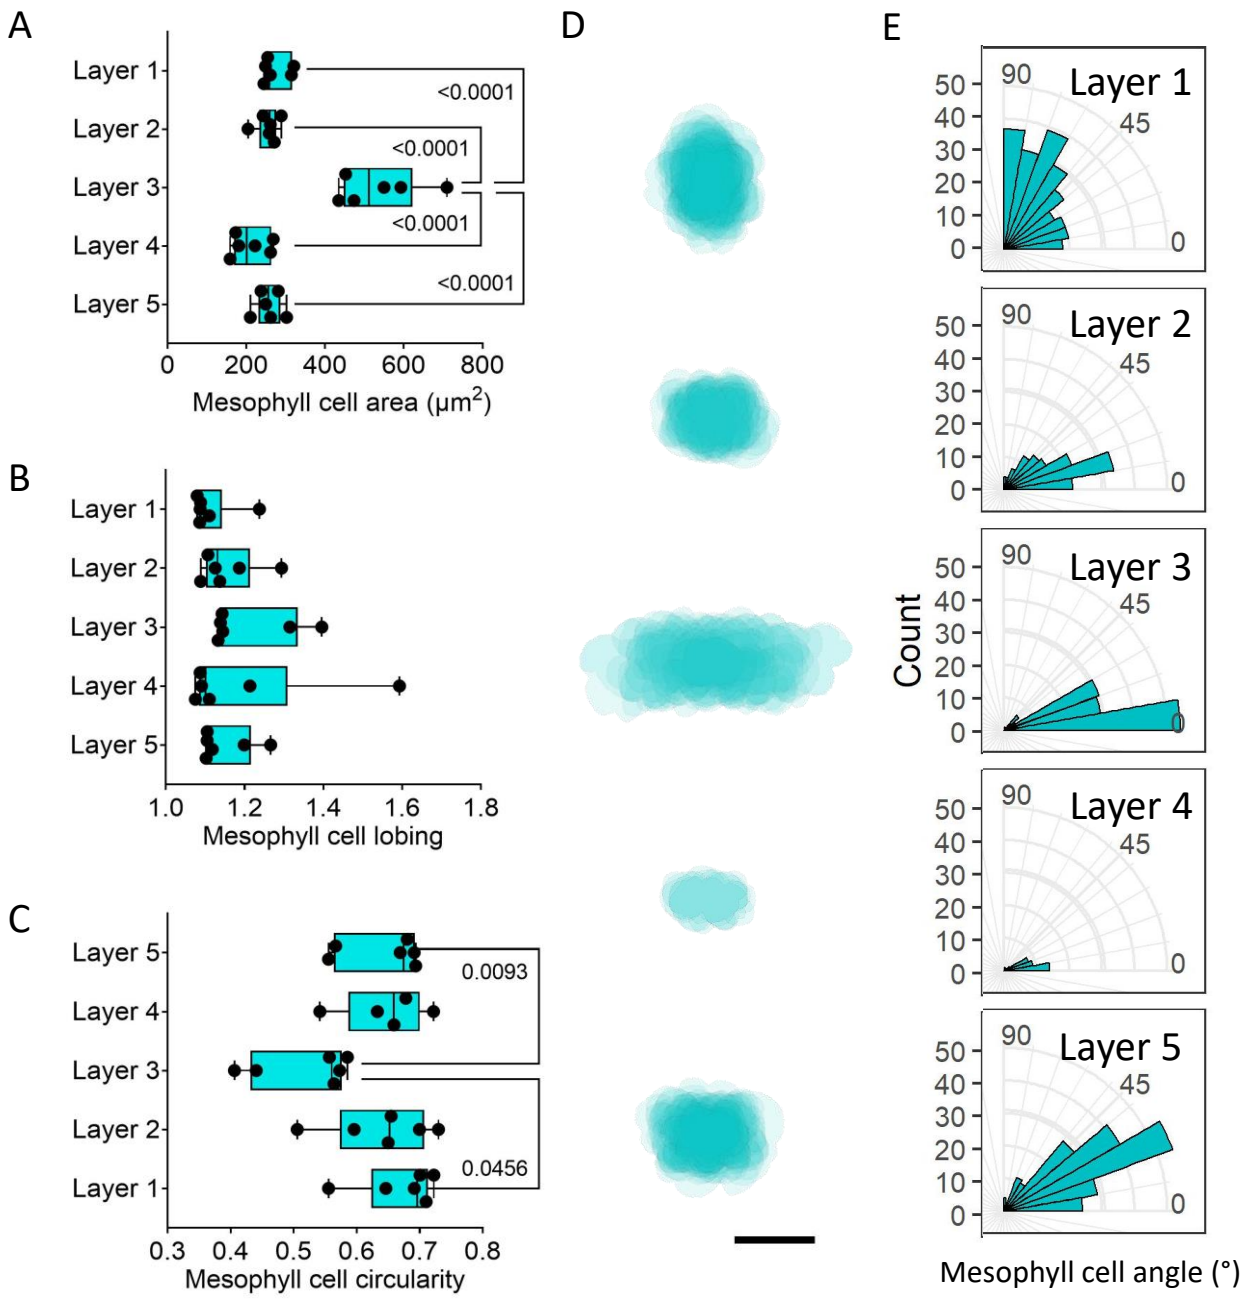

**Figure 4: The tissue layer patterning seen in IR64 is present in a range of rice varieties – demonstrated by *O. latifolia***

Representative data from middle of leaf 6 of 28 day old *O. latifolia*. **A)** Mesophyll cell area is largest in layer 3, One way ANOVA,  $p < 0.0001$ , Tukey pairwise multiple comparisons,  $p$  values as shown,  $n = 6$  **B)** Mesophyll cell lobing is lowest in layer 1. **C)** Mesophyll cell circularity is lowest in layer 3. One way ANOVA,  $p = 0.0105$ , Tukey pairwise multiple comparisons,  $p$  values as shown,  $n = 6$ . **D)** Mesophyll cell projections of all cells in each layer from one representative individual. **E)** Mesophyll cell angle – the angle of the longest axis of each cell differs by cell layer. Scale bar = 20  $\mu\text{m}$

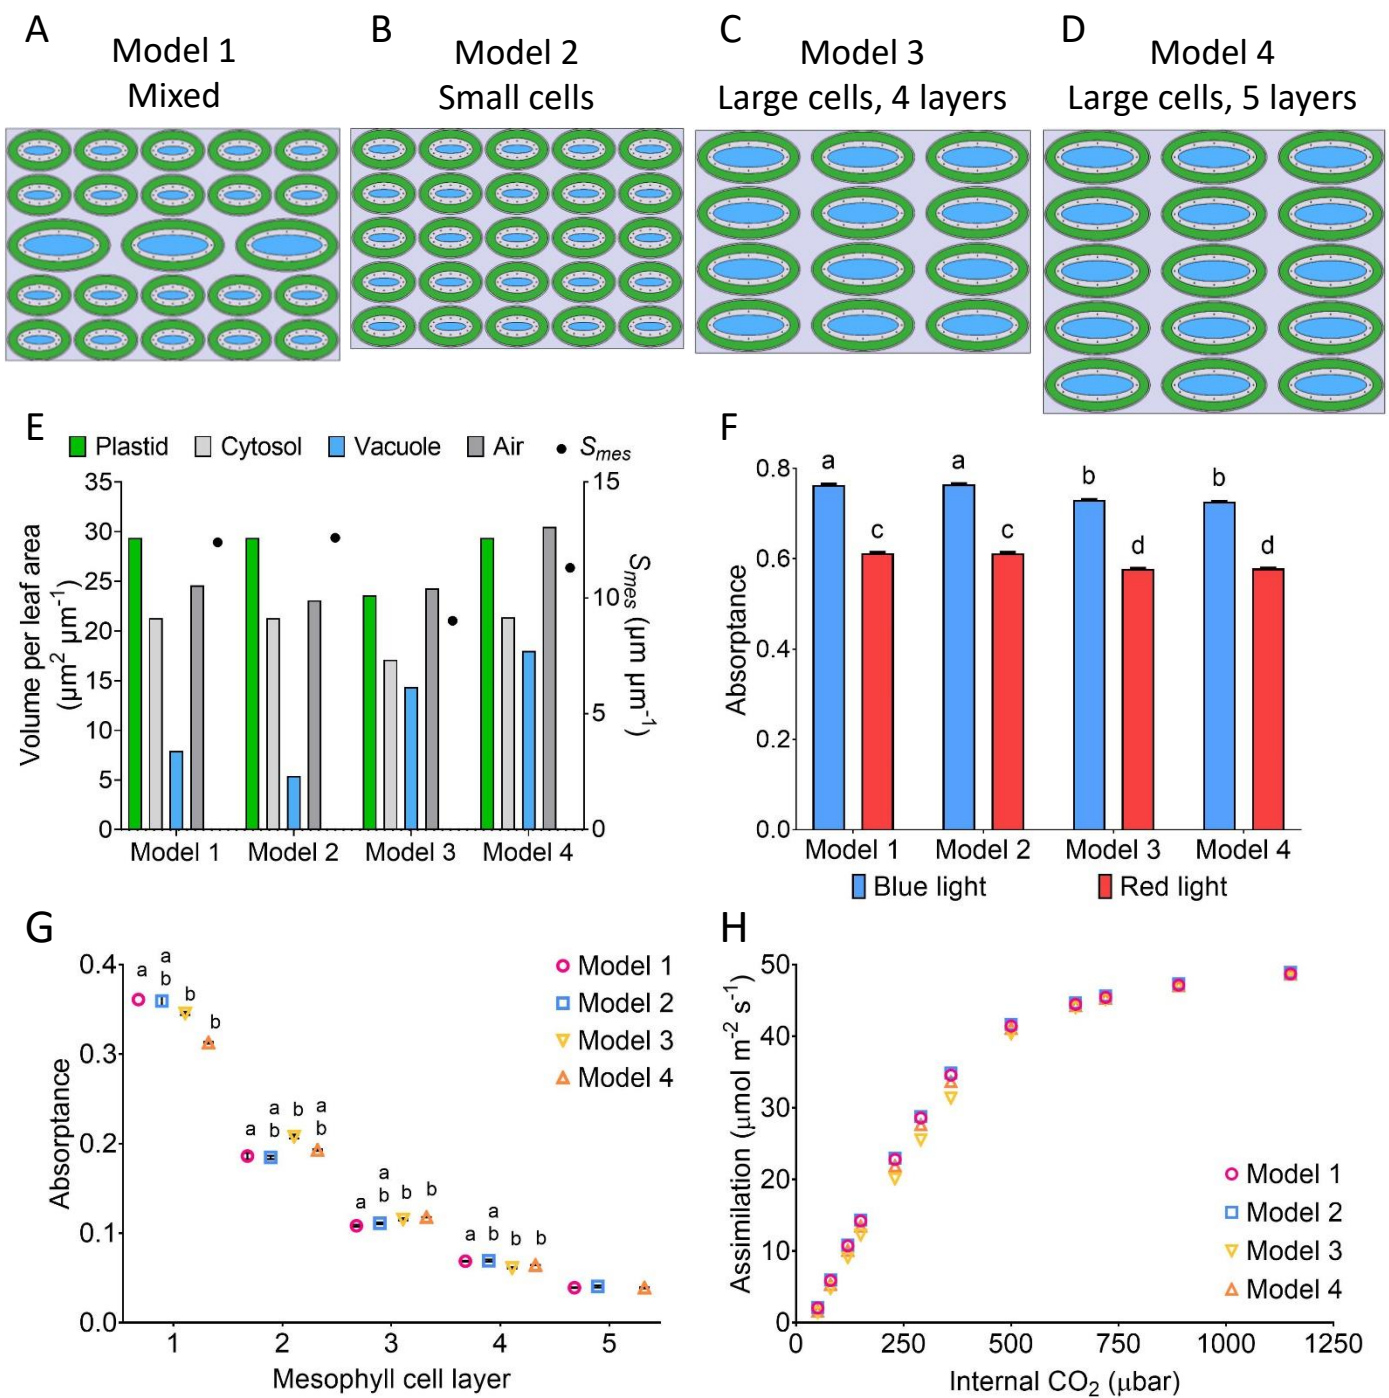

**Figure 5:  $\text{CO}_2$  and light move differently through four simplified mesophyll tissue models**

Four cell tissue layer models were designed, green represents plastid, white centres represent cytosol: **A)** Model 1 has larger cells in the middle layer (layer 3), **B)** Model 2 has five layers of small cells, **C)** Model 3 has four layers of large cells, **D)** Model 5 has five layers of large cells. Models 1, 2 and 4 have the same plastid and cytosol volume. Models 2 and 3 are the same leaf thickness. **E)**  $S_{mes}$  and the proportions of different cell elements in the 4 models. **F)** Total red and blue light absorbance is higher in Models 1 and 2 than Models 3 and 4 – mean with SEM. Two way ANOVA,  $p < 0.0001$ , Tukey multiple comparison - different letters represent significantly different values,  $p < 0.0001$ ,  $n = 3$  **G)** Blue light absorbance in each cell layer of the 4 models – mean values with SEM. Individual one way ANOVA performed for each cell layer - Layers 1-4  $p < 0.001$ , Layer 5 ns, Tukey multiple comparison - different letters represent significantly different values,  $p < 0.05$ ,  $n = 3$  **H)** Assimilation/Internal  $\text{CO}_2$  ( $C_i$ ) curves are very similar for the four models. Mean values,  $n = 3$ , SEM is too small for error bars to show.
